# Supplementary material for: Plasma microrna expression profile for reduced ejection fraction in dilated cardiomyopathy
Source: PubMed Central journal article supplement (PMC8024336; doi:10.1038/s41598-021-87086-1), 2021-04-06
Supplement: 41598_2021_87086_MOESM1_ESM.pdf [file 41598_2021_87086_MOESM1_ESM.pdf]

## **SUPPLEMENTARY INFORMATION**

### **TITLE: PLASMA MICRORNA EXPRESSION PROFILE FOR REDUCED EJECTION FRACTION IN DILATED CARDIOMYOPATHY**

Maria Calderon-Dominguez<sup>1\*</sup>. Thalía Belmonte<sup>1</sup>. Maribel Quezada-Feijoo<sup>2,3</sup>. Mónica Ramos<sup>2,3</sup>. Juan Calderon-Dominguez<sup>1</sup>. Oscar Campuzano<sup>5-7</sup>. Alipio Mangas<sup>1,8,9</sup>. Rocio Toro<sup>1,9\*</sup>

<sup>1</sup>Biomedical Research and Innovation Institute of Cadiz (INiBICA). Research Unit. Puerta del Mar University Hospital. Cádiz. Spain

<sup>2</sup>Cardiology Department. Cruz Roja Hospital. Madrid. Spain

<sup>3</sup>Universidad Alfonso X. Madrid. Spain

<sup>5</sup>Cardiovascular Genetics Center. University of Girona-IDIBGI. Girona. Spain <sup>6</sup>Medical Science Department. School of Medicine.

University of Girona. Girona. Spain

<sup>7</sup>Centro de Investigación Biomédica en Red. Enfermedades Cardiovasculares (CIBERCV). Spain

<sup>8</sup>Internal Medicine Department. Puerta del Mar University Hospital. School of Medicine. University of Cadiz. Spain

<sup>9</sup> Medicine Department. School of Medicine. University of Cadiz. Cádiz. Spain

# Supplemental figure 1

FIGURE S1.

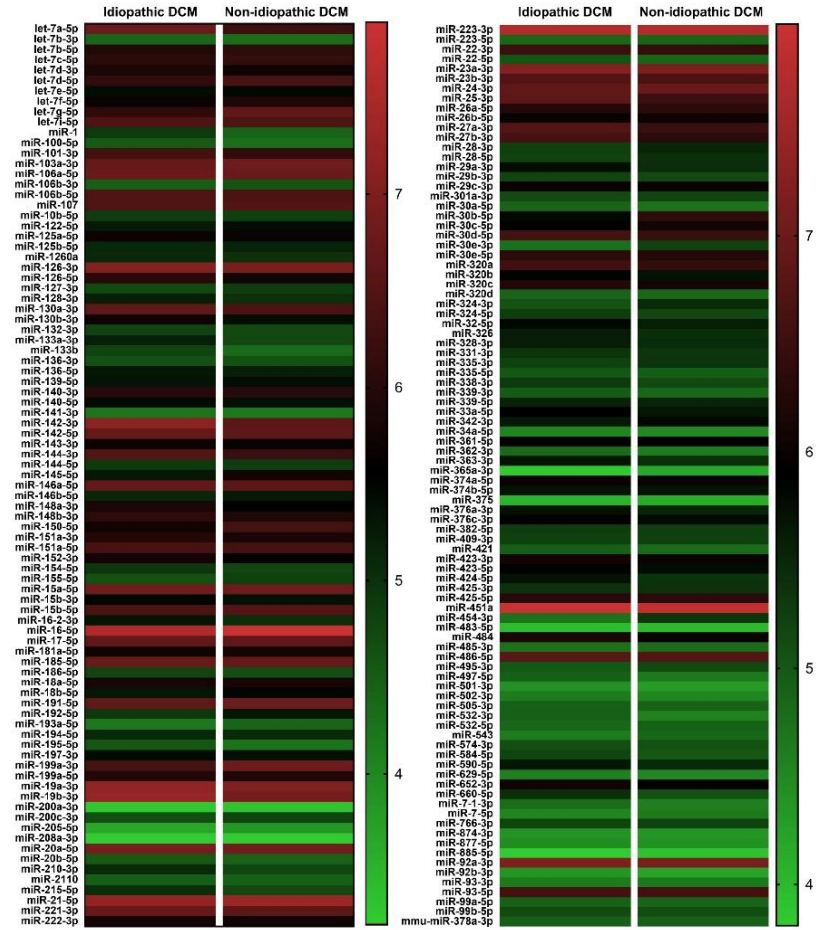

## Supplemental figure 2

FIGURE S2.

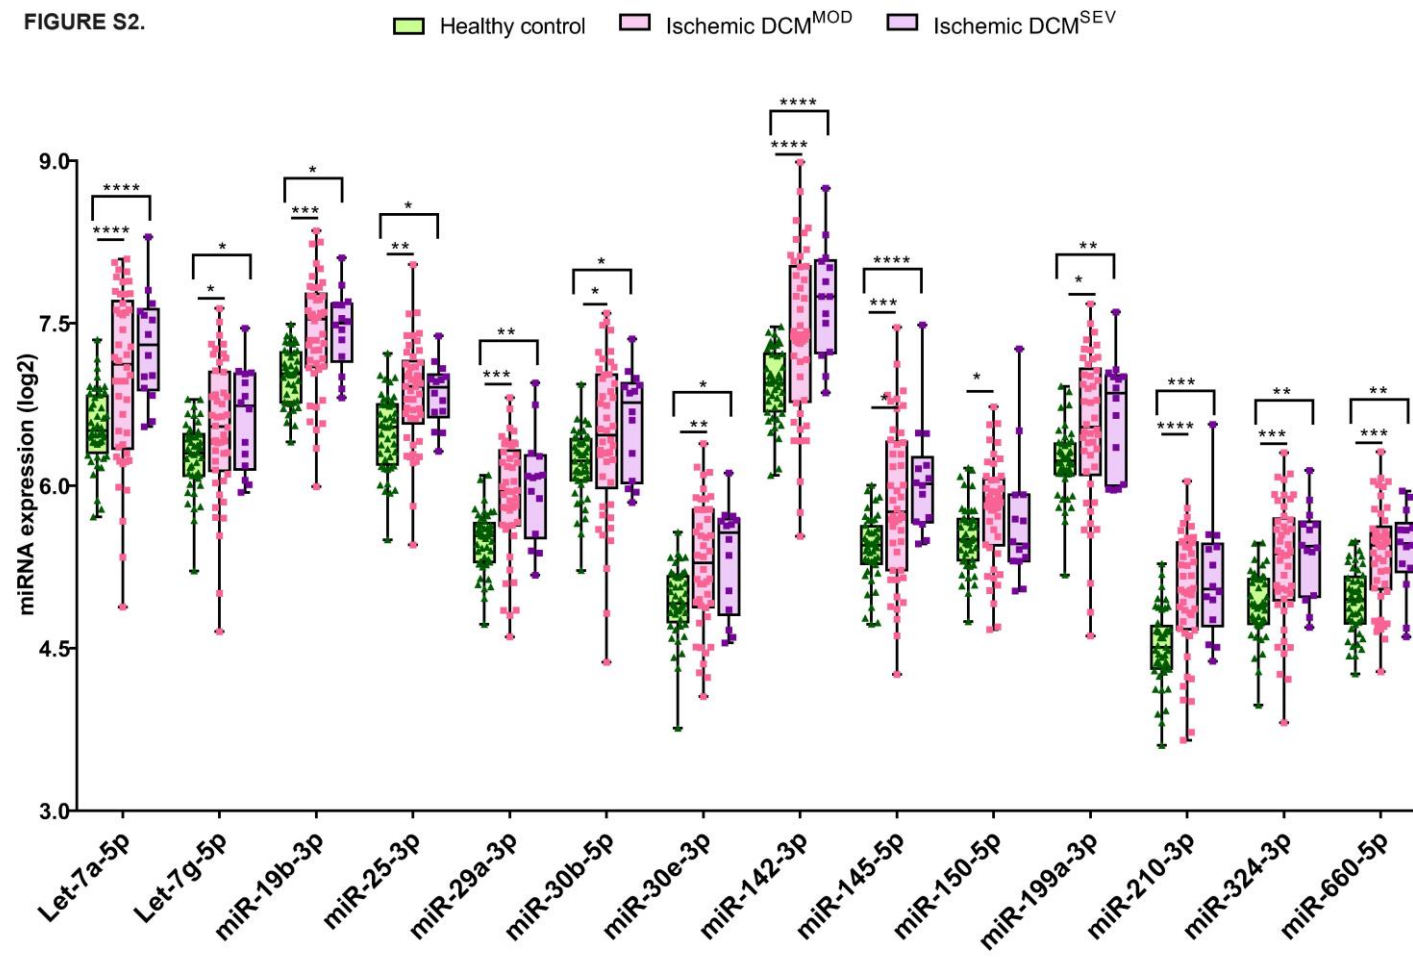



Supplemental figure 4

FIGURE S4.

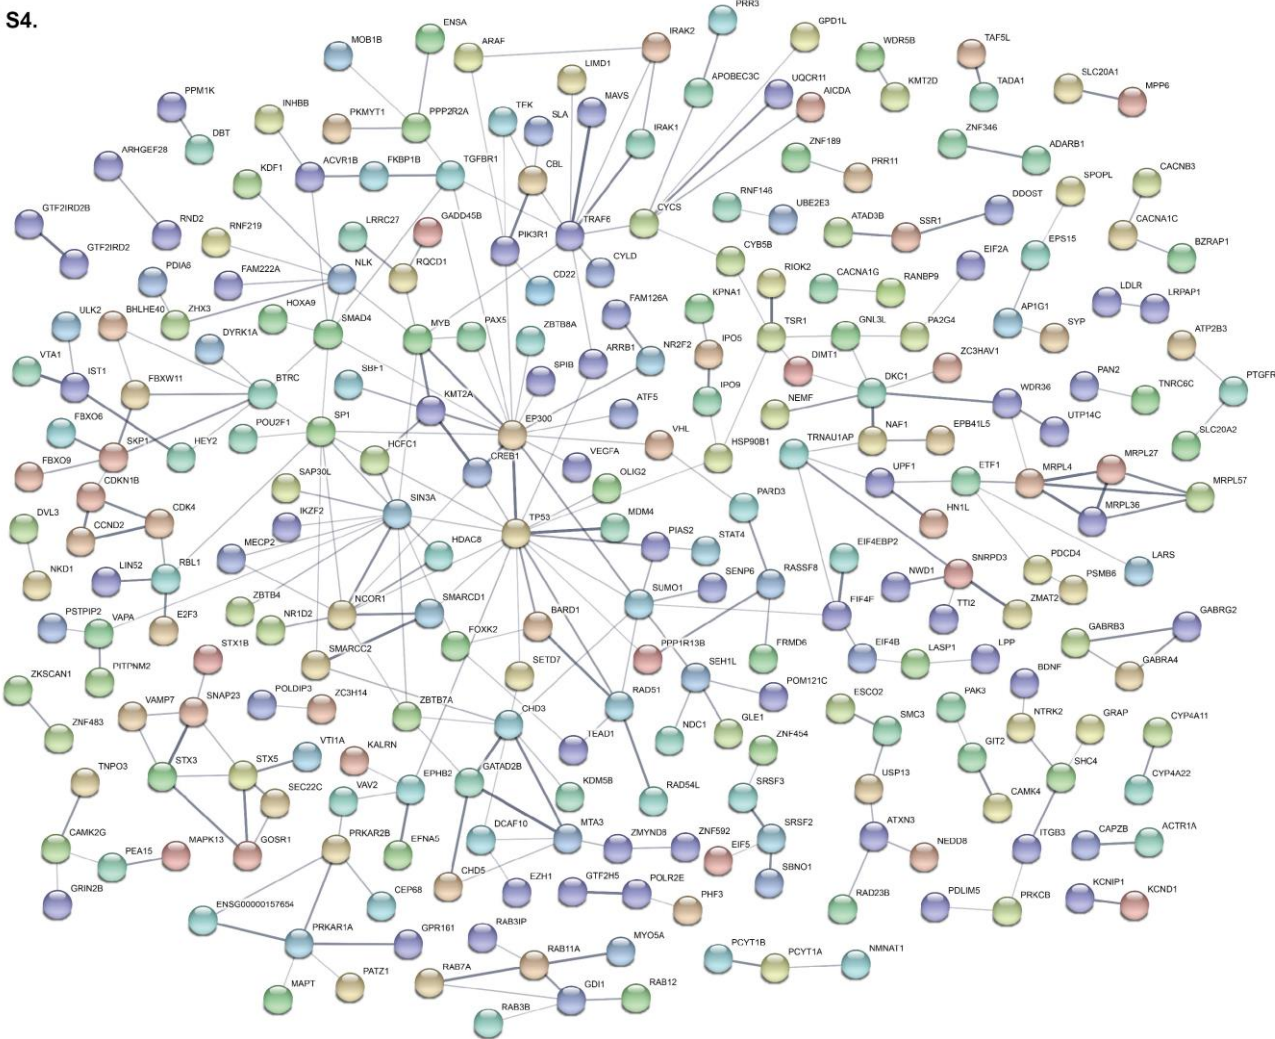

## Supplemental Table 1

| Supplemental Table 1. microRNAs levels (screening). |                         |                         |         |
|-----------------------------------------------------|-------------------------|-------------------------|---------|
| miRNA                                               | Idopathic DCM           | Non-idiopathic DCM      | p value |
|                                                     | Median (Q1-Q3)          | Median (Q1-Q3)          |         |
| <b>let-7a-5p</b>                                    | 6.740 ( 6.338 - 7.178 ) | 6.385 ( 6.080 - 6.535 ) | 0.0487  |
| <b>let-7b-3p</b>                                    | 4.346 ( 4.054 - 4.660 ) | 4.132 ( 4.024 - 4.679 ) | 0.4764  |
| <b>let-7b-5p</b>                                    | 5.845 ( 5.625 - 6.443 ) | 6.205 ( 5.646 - 6.601 ) | 0.4487  |
| <b>let-7c-5p</b>                                    | 6.165 ( 5.670 - 6.422 ) | 6.274 ( 5.498 - 6.618 ) | 0.7783  |
| <b>let-7d-3p</b>                                    | 5.763 ( 5.484 - 6.276 ) | 5.680 ( 5.464 - 6.050 ) | 0.5345  |
| <b>let-7d-5p</b>                                    | 6.067 ( 5.223 - 6.780 ) | 6.353 ( 6.183 - 6.655 ) | 0.3127  |
| <b>let-7e-5p</b>                                    | 5.477 ( 4.804 - 5.940 ) | 5.485 ( 4.980 - 5.863 ) | 0.848   |
| <b>let-7f-5p</b>                                    | 5.447 ( 4.809 - 6.493 ) | 5.866 ( 5.684 - 6.187 ) | 0.4626  |
| <b>let-7g-5p</b>                                    | 6.098 ( 5.551 - 6.807 ) | 6.495 ( 6.280 - 7.120 ) | 0.0452  |
| <b>let-7i-5p</b>                                    | 6.432 ( 6.047 - 6.844 ) | 6.381 ( 6.099 - 6.791 ) | 0.9551  |
| <b>miR-1</b>                                        | 4.834 ( 4.638 - 5.391 ) | 4.473 ( 3.943 - 4.767 ) | 0.018   |
| <b>miR-100-5p</b>                                   | 4.550 ( 4.232 - 4.736 ) | 4.234 ( 3.933 - 4.461 ) | 0.0875  |
| <b>miR-101-3p</b>                                   | 6.329 ( 5.938 - 6.659 ) | 6.067 ( 5.737 - 6.478 ) | 0.2515  |
| <b>miR-103a-3p</b>                                  | 6.654 ( 6.087 - 7.344 ) | 6.709 ( 6.555 - 7.221 ) | 0.7436  |
| <b>miR-106a-5p</b>                                  | 6.752 ( 6.243 - 7.257 ) | 6.656 ( 6.448 - 7.069 ) | 0.9911  |
| <b>miR-106b-3p</b>                                  | 4.292 ( 3.965 - 4.910 ) | 4.559 ( 4.235 - 4.990 ) | 0.5199  |
| <b>miR-106b-5p</b>                                  | 6.377 ( 5.985 - 6.954 ) | 6.265 ( 6.041 - 6.765 ) | 0.8303  |
| <b>miR-107</b>                                      | 6.479 ( 5.999 - 6.924 ) | 6.546 ( 6.061 - 6.859 ) | 0.8304  |
| <b>miR-10b-5p</b>                                   | 4.819 ( 4.646 - 5.067 ) | 4.819 ( 4.507 - 5.046 ) | 0.7268  |
| <b>miR-122-5p</b>                                   | 5.300 ( 4.650 - 5.706 ) | 5.400 ( 4.772 - 5.863 ) | 0.3353  |
| <b>miR-125a-5p</b>                                  | 5.714 ( 5.081 - 6.229 ) | 5.552 ( 5.360 - 5.965 ) | 0.973   |

|                    |                         |                         |        |
|--------------------|-------------------------|-------------------------|--------|
| <b>miR-125b-5p</b> | 5.060 ( 4.764 - 5.402 ) | 5.011 ( 4.815 - 5.359 ) | 0.848  |
| <b>miR-1260a</b>   | 5.164 ( 4.510 - 5.619 ) | 5.324 ( 4.060 - 5.584 ) | 0.955  |
| <b>miR-126-3p</b>  | 7.034 ( 6.590 - 7.593 ) | 6.823 ( 6.651 - 7.360 ) | 0.6603 |
| <b>miR-126-5p</b>  | 5.972 ( 5.573 - 6.526 ) | 5.771 ( 5.334 - 6.272 ) | 0.4026 |
| <b>miR-127-3p</b>  | 4.336 ( 3.932 - 5.495 ) | 4.849 ( 4.368 - 5.229 ) | 0.4088 |
| <b>miR-128-3p</b>  | 5.112 ( 4.815 - 5.545 ) | 4.979 ( 4.776 - 5.321 ) | 0.3591 |
| <b>miR-130a-3p</b> | 6.580 ( 6.407 - 7.036 ) | 6.274 ( 6.124 - 6.735 ) | 0.1608 |
| <b>miR-130b-3p</b> | 5.660 ( 5.307 - 6.059 ) | 5.260 ( 5.040 - 5.790 ) | 0.0138 |
| <b>miR-132-3p</b>  | 4.737 ( 4.412 - 5.177 ) | 4.694 ( 4.368 - 5.102 ) | 0.7433 |
| <b>miR-133a-3p</b> | 5.101 ( 4.887 - 5.639 ) | 4.620 ( 4.284 - 5.156 ) | 0.0283 |
| <b>miR-133b</b>    | 4.748 ( 4.539 - 5.275 ) | 4.180 ( 3.997 - 4.651 ) | 0.0361 |
| <b>miR-136-3p</b>  | 4.706 ( 3.651 - 5.434 ) | 4.635 ( 3.944 - 5.150 ) | 0.9553 |
| <b>miR-136-5p</b>  | 4.915 ( 4.712 - 6.165 ) | 5.147 ( 4.746 - 5.630 ) | 0.8747 |
| <b>miR-139-5p</b>  | 5.132 ( 4.790 - 5.966 ) | 5.381 ( 5.070 - 5.984 ) | 0.7015 |
| <b>miR-140-3p</b>  | 5.957 ( 5.684 - 6.326 ) | 5.920 ( 5.643 - 6.291 ) | 0.7267 |
| <b>miR-140-5p</b>  | 5.431 ( 4.951 - 5.815 ) | 5.244 ( 5.037 - 5.645 ) | 0.7958 |
| <b>miR-141-3p</b>  | 4.226 ( 3.618 - 4.938 ) | 4.145 ( 3.854 - 4.621 ) | 0.991  |
| <b>miR-142-3p</b>  | 7.120 ( 6.595 - 7.705 ) | 6.640 ( 6.375 - 6.860 ) | 0.0345 |
| <b>miR-142-5p</b>  | 6.724 ( 6.277 - 7.264 ) | 6.482 ( 6.295 - 6.854 ) | 0.8129 |
| <b>miR-143-3p</b>  | 5.549 ( 5.236 - 6.242 ) | 5.609 ( 5.208 - 5.878 ) | 0.9192 |
| <b>miR-144-3p</b>  | 6.463 ( 6.200 - 6.841 ) | 6.087 ( 5.716 - 6.649 ) | 0.1408 |
| <b>miR-144-5p</b>  | 4.877 ( 4.539 - 5.113 ) | 4.872 ( 4.585 - 5.118 ) | 0.8835 |
| <b>miR-145-5p</b>  | 5.385 ( 4.988 - 5.648 ) | 5.775 ( 5.418 - 6.098 ) | 0.0432 |
| <b>miR-146a-5p</b> | 6.578 ( 6.297 - 7.169 ) | 6.540 ( 6.322 - 6.965 ) | 0.9735 |
| <b>miR-146b-5p</b> | 5.102 ( 4.705 - 5.502 ) | 5.214 ( 4.713 - 5.685 ) | 0.6117 |
| <b>miR-148a-3p</b> | 5.832 ( 5.444 - 6.378 ) | 5.527 ( 5.110 - 6.002 ) | 0.2424 |
| <b>miR-148b-3p</b> | 6.017 ( 5.791 - 6.395 ) | 5.914 ( 5.625 - 6.226 ) | 0.4224 |

|                    |                         |                         |         |
|--------------------|-------------------------|-------------------------|---------|
| <b>miR-150-5p</b>  | 5.738 ( 5.408 - 5.906 ) | 6.090 ( 5.780 - 6.670 ) | 0.0427  |
| <b>miR-151a-3p</b> | 5.762 ( 5.623 - 6.367 ) | 5.877 ( 5.417 - 6.222 ) | 0.9192  |
| <b>miR-151a-5p</b> | 6.315 ( 5.813 - 6.996 ) | 6.232 ( 6.077 - 6.798 ) | >0.9999 |
| <b>miR-152-3p</b>  | 5.669 ( 5.446 - 6.112 ) | 5.601 ( 5.219 - 5.941 ) | 0.396   |
| <b>miR-154-5p</b>  | 4.791 ( 4.465 - 5.467 ) | 4.698 ( 4.172 - 5.210 ) | 0.4907  |
| <b>miR-155-5p</b>  | 4.586 ( 4.128 - 5.139 ) | 4.684 ( 4.516 - 5.287 ) | 0.4087  |
| <b>miR-15a-5p</b>  | 6.787 ( 6.491 - 7.220 ) | 6.701 ( 6.502 - 7.117 ) | 0.7352  |
| <b>miR-15b-3p</b>  | 5.456 ( 5.146 - 5.789 ) | 5.339 ( 5.047 - 5.625 ) | 0.4623  |
| <b>miR-15b-5p</b>  | 6.595 ( 5.955 - 7.119 ) | 6.558 ( 5.950 - 6.925 ) | 0.9372  |
| <b>miR-16-2-3p</b> | 5.420 ( 5.030 - 5.510 ) | 4.990 ( 4.773 - 5.295 ) | 0.0281  |
| <b>miR-16-5p</b>   | 7.560 ( 7.423 - 7.690 ) | 7.915 ( 7.610 - 8.180 ) | 0.0257  |
| <b>miR-17-5p</b>   | 6.643 ( 6.215 - 7.132 ) | 6.585 ( 6.332 - 7.041 ) | 0.973   |
| <b>miR-181a-5p</b> | 5.674 ( 5.200 - 6.236 ) | 5.823 ( 5.488 - 6.139 ) | 0.7015  |
| <b>miR-185-5p</b>  | 6.677 ( 6.326 - 7.102 ) | 6.668 ( 6.455 - 6.940 ) | 0.9461  |
| <b>miR-186-5p</b>  | 4.849 ( 4.103 - 5.526 ) | 4.787 ( 3.897 - 5.201 ) | 0.7954  |
| <b>miR-18a-5p</b>  | 5.812 ( 5.256 - 6.391 ) | 5.716 ( 5.491 - 6.114 ) | >0.9999 |
| <b>miR-18b-5p</b>  | 5.255 ( 4.813 - 5.941 ) | 5.372 ( 5.092 - 5.852 ) | 0.4017  |
| <b>miR-191-5p</b>  | 6.668 ( 5.897 - 7.207 ) | 6.663 ( 6.517 - 7.180 ) | 0.5495  |
| <b>miR-192-5p</b>  | 4.920 ( 4.680 - 5.180 ) | 5.235 ( 4.953 - 5.580 ) | 0.0398  |
| <b>miR-193a-5p</b> | 4.238 ( 3.728 - 4.495 ) | 4.352 ( 4.177 - 4.555 ) | 0.3241  |
| <b>miR-194-5p</b>  | 5.011 ( 4.789 - 5.452 ) | 4.998 ( 4.774 - 5.484 ) | 0.7612  |
| <b>miR-195-5p</b>  | 4.524 ( 4.300 - 5.031 ) | 4.317 ( 3.653 - 4.591 ) | 0.1226  |
| <b>miR-197-3p</b>  | 5.465 ( 4.901 - 5.830 ) | 5.258 ( 5.107 - 5.676 ) | 0.9371  |
| <b>miR-199a-3p</b> | 6.280 ( 6.065 - 6.970 ) | 6.735 ( 6.413 - 7.220 ) | 0.0417  |
| <b>miR-199a-5p</b> | 5.996 ( 5.398 - 6.508 ) | 5.755 ( 5.603 - 6.213 ) | 0.9547  |
| <b>miR-19a-3p</b>  | 7.201 ( 6.868 - 7.573 ) | 6.946 ( 6.658 - 7.356 ) | 0.2514  |
| <b>miR-19b-3p</b>  | 7.260 ( 6.918 - 7.638 ) | 6.845 ( 6.680 - 7.195 ) | 0.0304  |



|                    |                         |                         |         |
|--------------------|-------------------------|-------------------------|---------|
| <b>miR-200a-3p</b> | 3.138 ( 3.138 - 3.207 ) | 3.138 ( 3.138 - 3.490 ) | 0.9768  |
| <b>miR-200c-3p</b> | 4.720 ( 3.949 - 5.143 ) | 4.737 ( 4.583 - 5.100 ) | 0.744   |
| <b>miR-205-5p</b>  | 3.724 ( 3.553 - 3.763 ) | 3.783 ( 3.553 - 4.162 ) | 0.244   |
| <b>miR-208a-3p</b> | 3.220 ( 3.220 - 3.220 ) | 3.220 ( 3.220 - 3.220 ) | >0.9999 |
| <b>miR-20a-5p</b>  | 6.869 ( 6.502 - 7.319 ) | 6.849 ( 6.581 - 7.196 ) | 0.8129  |
| <b>miR-20b-5p</b>  | 4.631 ( 4.139 - 4.986 ) | 4.532 ( 3.869 - 4.993 ) | 0.6934  |
| <b>miR-210-3p</b>  | 4.966 ( 4.724 - 5.470 ) | 4.685 ( 4.500 - 4.983 ) | 0.0493  |
| <b>miR-2110</b>    | 4.341 ( 4.102 - 4.951 ) | 4.266 ( 4.101 - 4.743 ) | >0.9999 |
| <b>miR-215-5p</b>  | 5.005 ( 4.698 - 5.358 ) | 4.695 ( 4.570 - 4.855 ) | 0.0266  |
| <b>miR-21-5p</b>   | 7.195 ( 6.962 - 7.682 ) | 7.363 ( 6.912 - 7.923 ) | 0.9347  |
| <b>miR-221-3p</b>  | 6.588 ( 6.312 - 7.164 ) | 6.498 ( 6.323 - 6.905 ) | 0.6275  |
| <b>miR-222-3p</b>  | 5.632 ( 5.469 - 6.127 ) | 5.621 ( 5.380 - 6.043 ) | 0.5802  |
| <b>miR-223-3p</b>  | 7.734 ( 7.157 - 8.241 ) | 7.492 ( 7.326 - 8.024 ) | 0.9376  |
| <b>miR-223-5p</b>  | 4.653 ( 4.497 - 5.151 ) | 4.806 ( 4.455 - 5.147 ) | 0.919   |
| <b>miR-22-3p</b>   | 6.530 ( 6.221 - 6.944 ) | 6.390 ( 6.074 - 6.673 ) | 0.5196  |
| <b>miR-22-5p</b>   | 5.086 ( 4.619 - 5.397 ) | 4.758 ( 4.523 - 5.146 ) | 0.313   |
| <b>miR-23a-3p</b>  | 7.183 ( 6.689 - 7.615 ) | 7.052 ( 6.873 - 7.446 ) | 0.8393  |
| <b>miR-23b-3p</b>  | 6.608 ( 6.256 - 7.164 ) | 6.664 ( 6.356 - 6.955 ) | 0.9013  |
| <b>miR-24-3p</b>   | 6.803 ( 6.580 - 7.406 ) | 6.902 ( 6.570 - 7.495 ) | 0.8896  |
| <b>miR-25-3p</b>   | 6.885 ( 6.548 - 7.158 ) | 6.550 ( 6.375 - 6.618 ) | 0.0495  |
| <b>miR-26a-5p</b>  | 6.323 ( 5.775 - 6.853 ) | 6.488 ( 5.646 - 7.016 ) | 0.9103  |
| <b>miR-26b-5p</b>  | 5.873 ( 5.583 - 6.551 ) | 6.204 ( 5.172 - 6.672 ) | 0.7433  |
| <b>miR-27a-3p</b>  | 6.820 ( 6.245 - 7.269 ) | 6.466 ( 6.134 - 6.876 ) | 0.3021  |
| <b>miR-27b-3p</b>  | 6.685 ( 6.134 - 7.051 ) | 6.295 ( 5.892 - 6.720 ) | 0.1824  |
| <b>miR-28-3p</b>   | 5.188 ( 4.825 - 5.857 ) | 5.409 ( 5.173 - 6.024 ) | 0.3772  |
| <b>miR-28-5p</b>   | 5.131 ( 4.418 - 5.999 ) | 5.307 ( 5.114 - 5.820 ) | 0.5802  |
| <b>miR-29a-3p</b>  | 6.080 ( 5.550 - 6.170 ) | 5.340 ( 5.210 - 5.748 ) | 0.0461  |

|                    |                         |                         |         |
|--------------------|-------------------------|-------------------------|---------|
| <b>miR-29b-3p</b>  | 5.213 ( 4.850 - 5.665 ) | 4.855 ( 4.769 - 5.351 ) | 0.5496  |
| <b>miR-29c-3p</b>  | 6.018 ( 5.622 - 6.508 ) | 5.934 ( 5.626 - 6.323 ) | 0.8305  |
| <b>miR-301a-3p</b> | 5.152 ( 4.560 - 5.691 ) | 5.054 ( 4.866 - 5.576 ) | 0.9192  |
| <b>miR-30a-5p</b>  | 4.835 ( 4.486 - 5.474 ) | 4.772 ( 4.176 - 5.148 ) | 0.6766  |
| <b>miR-30b-5p</b>  | 5.740 ( 5.240 - 6.530 ) | 6.305 ( 5.994 - 6.824 ) | 0.0379  |
| <b>miR-30c-5p</b>  | 5.963 ( 5.337 - 6.561 ) | 5.947 ( 5.804 - 6.347 ) | 0.7267  |
| <b>miR-30d-5p</b>  | 6.439 ( 6.249 - 6.952 ) | 6.484 ( 6.068 - 6.954 ) | 0.6604  |
| <b>miR-30e-3p</b>  | 4.550 ( 4.240 - 5.285 ) | 5.120 ( 4.805 - 5.695 ) | 0.0446  |
| <b>miR-30e-5p</b>  | 6.261 ( 5.966 - 6.760 ) | 6.254 ( 5.810 - 6.608 ) | 0.6929  |
| <b>miR-320a</b>    | 6.513 ( 6.201 - 6.973 ) | 6.445 ( 5.922 - 6.763 ) | 0.5958  |
| <b>miR-320b</b>    | 5.835 ( 5.381 - 6.376 ) | 5.816 ( 5.255 - 6.218 ) | 0.66    |
| <b>miR-320c</b>    | 6.247 ( 5.799 - 6.770 ) | 6.214 ( 5.705 - 6.579 ) | 0.6275  |
| <b>miR-320d</b>    | 5.151 ( 3.559 - 5.656 ) | 5.156 ( 3.981 - 5.546 ) | >0.9999 |
| <b>miR-324-3p</b>  | 4.950 ( 4.735 - 5.500 ) | 5.420 ( 5.045 - 5.875 ) | 0.0364  |
| <b>miR-324-5p</b>  | 5.170 ( 4.841 - 5.901 ) | 5.010 ( 4.795 - 5.523 ) | 0.7613  |
| <b>miR-32-5p</b>   | 5.800 ( 5.553 - 6.229 ) | 5.457 ( 5.308 - 5.925 ) | 0.1505  |
| <b>miR-326</b>     | 5.552 ( 5.206 - 6.064 ) | 5.254 ( 5.090 - 5.694 ) | 0.3241  |
| <b>miR-328-3p</b>  | 5.587 ( 5.132 - 6.003 ) | 5.374 ( 5.151 - 5.845 ) | 0.5957  |
| <b>miR-331-3p</b>  | 5.380 ( 4.842 - 5.897 ) | 5.176 ( 4.943 - 5.727 ) | 0.9192  |
| <b>miR-335-3p</b>  | 5.159 ( 4.762 - 5.632 ) | 5.284 ( 5.019 - 5.605 ) | 0.4904  |
| <b>miR-335-5p</b>  | 5.234 ( 4.238 - 5.754 ) | 5.054 ( 4.441 - 5.462 ) | 0.7694  |
| <b>miR-338-3p</b>  | 5.237 ( 4.823 - 5.728 ) | 4.985 ( 4.771 - 5.599 ) | 0.5197  |
| <b>miR-339-3p</b>  | 4.979 ( 4.480 - 5.424 ) | 4.719 ( 4.548 - 5.248 ) | 0.6728  |
| <b>miR-339-5p</b>  | 5.641 ( 4.935 - 6.155 ) | 5.473 ( 5.159 - 5.899 ) | 0.9908  |
| <b>miR-33a-5p</b>  | 5.931 ( 5.501 - 6.263 ) | 5.514 ( 5.279 - 6.071 ) | 0.2422  |
| <b>miR-342-3p</b>  | 5.455 ( 5.283 - 6.200 ) | 5.628 ( 5.400 - 6.150 ) | 0.8837  |
| <b>miR-34a-5p</b>  | 4.467 ( 4.140 - 4.942 ) | 4.399 ( 4.211 - 4.671 ) | 0.8837  |

|                    |                         |                         |        |
|--------------------|-------------------------|-------------------------|--------|
| <b>miR-361-5p</b>  | 5.806 ( 5.532 - 6.447 ) | 5.757 ( 5.508 - 6.226 ) | 0.7695 |
| <b>miR-362-3p</b>  | 4.802 ( 4.475 - 5.079 ) | 4.474 ( 4.306 - 5.035 ) | 0.261  |
| <b>miR-363-3p</b>  | 5.670 ( 5.480 - 5.920 ) | 5.345 ( 5.178 - 5.718 ) | 0.0428 |
| <b>miR-365a-3p</b> | 3.925 ( 3.456 - 4.200 ) | 4.058 ( 3.880 - 4.510 ) | 0.2108 |
| <b>miR-374a-5p</b> | 6.063 ( 5.463 - 6.559 ) | 5.964 ( 5.640 - 6.542 ) | 0.9103 |
| <b>miR-374b-5p</b> | 5.675 ( 5.168 - 6.313 ) | 5.634 ( 5.159 - 6.216 ) | 0.973  |
| <b>miR-375</b>     | 3.959 ( 3.725 - 4.369 ) | 3.970 ( 3.876 - 4.476 ) | 0.5956 |
| <b>miR-376a-3p</b> | 5.712 ( 5.076 - 6.187 ) | 5.553 ( 5.108 - 6.024 ) | 0.4224 |
| <b>miR-376c-3p</b> | 5.766 ( 5.438 - 6.538 ) | 5.684 ( 5.115 - 6.271 ) | 0.7098 |
| <b>miR-382-5p</b>  | 5.117 ( 4.818 - 5.710 ) | 5.300 ( 4.735 - 5.626 ) | 0.8602 |
| <b>miR-409-3p</b>  | 5.051 ( 4.643 - 5.809 ) | 5.244 ( 4.660 - 5.682 ) | 0.8479 |
| <b>miR-421</b>     | 4.789 ( 4.551 - 5.402 ) | 4.687 ( 4.525 - 5.235 ) | 0.6439 |
| <b>miR-423-3p</b>  | 6.030 ( 5.601 - 6.459 ) | 5.882 ( 5.716 - 6.452 ) | 0.8658 |
| <b>miR-423-5p</b>  | 5.775 ( 5.554 - 6.143 ) | 5.776 ( 5.290 - 6.085 ) | 0.6765 |
| <b>miR-424-5p</b>  | 5.822 ( 5.176 - 6.101 ) | 5.485 ( 4.807 - 5.774 ) | 0.1477 |
| <b>miR-425-3p</b>  | 5.369 ( 4.921 - 5.767 ) | 5.242 ( 5.088 - 5.621 ) | 0.7959 |
| <b>miR-425-5p</b>  | 6.278 ( 5.857 - 6.665 ) | 6.198 ( 6.033 - 6.599 ) | 0.7608 |
| <b>miR-451a</b>    | 8.104 ( 7.564 - 8.270 ) | 7.812 ( 7.472 - 8.253 ) | 0.4762 |
| <b>miR-454-3p</b>  | 4.690 ( 4.170 - 5.395 ) | 5.315 ( 4.985 - 5.513 ) | 0.0428 |
| <b>miR-483-5p</b>  | 3.980 ( 3.758 - 4.290 ) | 3.937 ( 3.849 - 4.371 ) | 0.5953 |
| <b>miR-484</b>     | 6.114 ( 5.705 - 6.578 ) | 5.981 ( 5.727 - 6.306 ) | 0.4764 |
| <b>miR-485-3p</b>  | 4.480 ( 4.136 - 5.411 ) | 4.737 ( 4.346 - 5.202 ) | 0.733  |
| <b>miR-486-5p</b>  | 6.861 ( 6.449 - 7.108 ) | 6.664 ( 6.516 - 6.966 ) | 0.6437 |
| <b>miR-495-3p</b>  | 4.658 ( 4.512 - 5.784 ) | 5.019 ( 4.683 - 5.582 ) | 0.5338 |
| <b>miR-497-5p</b>  | 4.835 ( 4.573 - 5.238 ) | 4.586 ( 4.472 - 4.855 ) | 0.1749 |
| <b>miR-501-3p</b>  | 4.340 ( 4.085 - 4.777 ) | 4.291 ( 3.944 - 4.663 ) | 0.4625 |
| <b>miR-502-3p</b>  | 4.603 ( 4.366 - 5.018 ) | 4.447 ( 4.187 - 4.788 ) | 0.4222 |

|                        |                         |                         |        |
|------------------------|-------------------------|-------------------------|--------|
| <b>miR-505-3p</b>      | 4.781 ( 4.399 - 5.351 ) | 4.763 ( 4.427 - 5.312 ) | 0.991  |
| <b>miR-532-3p</b>      | 4.860 ( 4.570 - 5.255 ) | 4.625 ( 4.383 - 4.695 ) | 0.5957 |
| <b>miR-532-5p</b>      | 4.761 ( 4.535 - 5.225 ) | 4.821 ( 4.672 - 5.110 ) | 0.04   |
| <b>miR-543</b>         | 4.364 ( 4.080 - 5.305 ) | 4.752 ( 4.356 - 5.286 ) | 0.3471 |
| <b>miR-574-3p</b>      | 4.904 ( 4.693 - 5.508 ) | 4.875 ( 4.726 - 5.562 ) | 0.9734 |
| <b>miR-584-5p</b>      | 5.112 ( 4.750 - 5.653 ) | 5.099 ( 4.489 - 5.370 ) | 0.5648 |
| <b>miR-590-5p</b>      | 5.726 ( 5.460 - 5.957 ) | 5.320 ( 5.124 - 5.842 ) | 0.179  |
| <b>miR-629-5p</b>      | 4.529 ( 4.304 - 4.883 ) | 4.497 ( 4.122 - 4.820 ) | 0.5802 |
| <b>miR-652-3p</b>      | 5.995 ( 5.595 - 6.486 ) | 5.918 ( 5.578 - 6.253 ) | 0.5646 |
| <b>miR-660-5p</b>      | 5.345 ( 5.210 - 5.610 ) | 5.060 ( 4.793 - 5.403 ) | 0.0151 |
| <b>miR-7-1-3p</b>      | 4.740 ( 4.311 - 5.149 ) | 4.515 ( 4.185 - 5.036 ) | 0.4906 |
| <b>miR-7-5p</b>        | 4.540 ( 4.057 - 5.044 ) | 4.735 ( 4.258 - 5.086 ) | 0.643  |
| <b>miR-766-3p</b>      | 5.165 ( 4.705 - 5.728 ) | 4.996 ( 4.913 - 5.668 ) | 0.8836 |
| <b>miR-874-3p</b>      | 4.325 ( 4.124 - 4.654 ) | 4.298 ( 3.995 - 4.471 ) | 0.7609 |
| <b>miR-877-5p</b>      | 4.354 ( 4.098 - 4.915 ) | 4.369 ( 4.112 - 4.692 ) | 0.8129 |
| <b>miR-885-5p</b>      | 3.786 ( 3.394 - 4.315 ) | 4.073 ( 3.580 - 4.296 ) | 0.6928 |
| <b>miR-92a-3p</b>      | 7.174 ( 6.866 - 7.576 ) | 7.018 ( 6.852 - 7.451 ) | 0.7015 |
| <b>miR-92b-3p</b>      | 4.245 ( 4.033 - 4.879 ) | 4.362 ( 3.852 - 4.680 ) | 0.6273 |
| <b>miR-93-3p</b>       | 4.529 ( 4.337 - 5.085 ) | 4.523 ( 4.383 - 4.907 ) | 0.9552 |
| <b>miR-93-5p</b>       | 6.531 ( 6.157 - 6.940 ) | 6.544 ( 6.298 - 6.845 ) | 0.9189 |
| <b>miR-99a-5p</b>      | 4.795 ( 4.665 - 5.167 ) | 4.845 ( 4.552 - 5.235 ) | 0.9193 |
| <b>miR-99b-5p</b>      | 5.144 ( 4.713 - 5.550 ) | 5.081 ( 4.811 - 5.474 ) | 0.9551 |
| <b>mmu-miR-378a-3p</b> | 4.961 ( 4.561 - 5.194 ) | 4.773 ( 4.515 - 5.209 ) | 0.8656 |

Data presented as median (Q1-Q3). Differences between groups were analyzed using Mann-Whitney test. Abbreviations: DCM, dilated cardiomyopathy

Supplemental Table 2

| Supplemental Table 2. Pearson correlation between the echocardiographic parameter and individual miRNA levels for EF subtype categorization in ischemic DCM patients. |                    |       |                    |       |                    |       |                    |       |                    |       |                    |       |
|-----------------------------------------------------------------------------------------------------------------------------------------------------------------------|--------------------|-------|--------------------|-------|--------------------|-------|--------------------|-------|--------------------|-------|--------------------|-------|
| microRNA                                                                                                                                                              | Ischemic DCM       |       |                    |       |                    |       |                    |       |                    |       |                    |       |
|                                                                                                                                                                       | LVEF (%)           |       |                    |       | LVESD (mm)         |       |                    |       | Left Atrium (mm)   |       |                    |       |
|                                                                                                                                                                       | DCM <sup>SEV</sup> |       | DCM <sup>MOD</sup> |       | DCM <sup>SEV</sup> |       | DCM <sup>MOD</sup> |       | DCM <sup>SEV</sup> |       | DCM <sup>MOD</sup> |       |
|                                                                                                                                                                       | r                  | p     | r                  | p     | r                  | p     | r                  | p     | r                  | p     | r                  | p     |
| let-7a-5p                                                                                                                                                             | -0.384             | 0.176 | 0.111              | 0.463 | 0.092              | 0.753 | 0.297              | 0.045 | 0.282              | 0.328 | 0.172              | 0.253 |
| let-7g-5p                                                                                                                                                             | -0.204             | 0.485 | 0.138              | 0.359 | 0.076              | 0.795 | 0.248              | 0.096 | 0.499              | 0.069 | 0.124              | 0.410 |
| miR-1-3p                                                                                                                                                              | 0.211              | 0.470 | 0.169              | 0.260 | 0.005              | 0.985 | 0.222              | 0.138 | 0.399              | 0.158 | -0.099             | 0.514 |
| miR-16-5p                                                                                                                                                             | 0.012              | 0.968 | -0.030             | 0.125 | -0.261             | 0.367 | 0.322              | 0.125 | 0.416              | 0.139 | 0.201              | 0.125 |
| miR-16-2-3p                                                                                                                                                           | 0.010              | 0.973 | -0.047             | 0.259 | -0.477             | 0.084 | 0.351              | 0.259 | 0.301              | 0.295 | 0.232              | 0.259 |
| miR-19b-3p                                                                                                                                                            | 0.027              | 0.927 | -0.026             | 0.861 | -0.133             | 0.650 | 0.309              | 0.037 | 0.472              | 0.088 | 0.194              | 0.197 |
| miR-25-3p                                                                                                                                                             | -0.029             | 0.922 | 0.191              | 0.204 | -0.218             | 0.454 | 0.170              | 0.260 | 0.499              | 0.069 | 0.076              | 0.615 |
| miR-29a-3p                                                                                                                                                            | 0.332              | 0.069 | 0.199              | 0.184 | -0.266             | 0.069 | 0.273              | 0.067 | 0.282              | 0.069 | 0.136              | 0.369 |
| miR-30b-5p                                                                                                                                                            | -0.070             | 0.139 | 0.192              | 0.201 | 0.136              | 0.139 | 0.229              | 0.126 | 0.420              | 0.139 | 0.085              | 0.576 |
| miR-30e-3p                                                                                                                                                            | -0.026             | 0.259 | 0.078              | 0.607 | 0.124              | 0.259 | 0.379              | 0.009 | 0.435              | 0.259 | 0.157              | 0.297 |
| miR-130b-3p                                                                                                                                                           | 0.144              | 0.624 | 0.131              | 0.385 | -0.204             | 0.483 | 0.102              | 0.500 | 0.416              | 0.139 | -0.013             | 0.930 |
| miR-133a-3p                                                                                                                                                           | -0.171             | 0.560 | 0.135              | 0.372 | 0.225              | 0.440 | 0.136              | 0.366 | 0.324              | 0.259 | 0.006              | 0.967 |
| miR-133b                                                                                                                                                              | 0.262              | 0.365 | 0.172              | 0.252 | 0.083              | 0.778 | 0.051              | 0.736 | 0.430              | 0.125 | 0.171              | 0.256 |
| miR-142-3p                                                                                                                                                            | -0.277             | 0.338 | 0.195              | 0.069 | -0.024             | 0.936 | 0.177              | 0.069 | 0.290              | 0.315 | 0.160              | 0.069 |
| miR-145-5p                                                                                                                                                            | -0.458             | 0.099 | 0.229              | 0.139 | 0.037              | 0.900 | 0.346              | 0.139 | 0.252              | 0.384 | 0.091              | 0.139 |
| miR-150-5p                                                                                                                                                            | 0.086              | 0.769 | 0.000              | 0.158 | 0.060              | 0.838 | 0.306              | 0.158 | 0.320              | 0.264 | 0.185              | 0.158 |
| miR-192-5p                                                                                                                                                            | 0.199              | 0.496 | 0.155              | 0.304 | -0.531             | 0.051 | 0.209              | 0.164 | 0.126              | 0.668 | 0.072              | 0.636 |
| miR-199a-3p                                                                                                                                                           | 0.017              | 0.955 | 0.051              | 0.738 | 0.053              | 0.857 | 0.287              | 0.053 | 0.468              | 0.091 | 0.192              | 0.201 |
| miR-210-3p                                                                                                                                                            | 0.214              | 0.463 | 0.014              | 0.924 | -0.398             | 0.159 | 0.357              | 0.015 | 0.119              | 0.685 | 0.199              | 0.186 |
| miR-215-3p                                                                                                                                                            | 0.274              | 0.343 | -0.009             | 0.952 | -0.562             | 0.037 | 0.304              | 0.040 | 0.200              | 0.494 | 0.175              | 0.244 |
| miR-324-3p                                                                                                                                                            | 0.199              | 0.125 | 0.053              | 0.729 | -0.126             | 0.125 | 0.238              | 0.112 | 0.533              | 0.125 | 0.139              | 0.356 |
| miR-363-3p                                                                                                                                                            | 0.115              | 0.158 | -0.050             | 0.741 | -0.404             | 0.158 | 0.329              | 0.025 | 0.492              | 0.158 | 0.220              | 0.142 |
| miR-454-3p                                                                                                                                                            | -0.328             | 0.252 | 0.144              | 0.338 | 0.056              | 0.850 | 0.063              | 0.677 | 0.288              | 0.319 | 0.022              | 0.884 |
| miR-532-5p                                                                                                                                                            | 0.012              | 0.969 | 0.030              | 0.841 | -0.257             | 0.375 | 0.357              | 0.015 | 0.492              | 0.074 | 0.143              | 0.344 |
| miR-629-5p                                                                                                                                                            | 0.215              | 0.460 | -0.252             | 0.091 | -0.252             | 0.385 | 0.303              | 0.041 | 0.286              | 0.322 | 0.229              | 0.125 |

---

|                   |       |       |        |       |        |       |       |       |       |       |       |       |
|-------------------|-------|-------|--------|-------|--------|-------|-------|-------|-------|-------|-------|-------|
| <b>miR-660-5p</b> | 0.090 | 0.760 | -0.087 | 0.564 | -0.436 | 0.119 | 0.302 | 0.041 | 0.316 | 0.272 | 0.253 | 0.089 |
|-------------------|-------|-------|--------|-------|--------|-------|-------|-------|-------|-------|-------|-------|

---

Abbreviations: DCM, dilated cardiomyopathy; DCM<sup>MOD</sup>, dilated cardiomyopathy with ejection fraction  $\geq 31$ -49%; DCM<sup>SEV</sup>, dilated cardiomyopathy with ejection fraction  $\leq 30$ %; EF, ejection fraction; LVESD, LV end-systolic diameter. Coefficient significant at  $p < 0.05$ .

---

**Supplemental Table 3. Pathway analysis main findings: PPI enrichment analysis based on miR-210-3p and miR-150-5p target genes**

| Pathway                        | Overlap   | FDR     | Genes                                                                                                                                                                                                                                                                                                                                                                                                                                                                                                                                                                                                                                                                                                                                                                                                                                                                                                                                                                                                                                                                                                                                                                                                                                                                                                                                                                                                                                                                                                                                                                                                                                                                                                                                                                                                                                                                                                                                                                                                                                                                                                                                                                                                                                                                                                                                                                                                                                                                                                                                                                                                                                                                                                                                                                                                                                                                                                                                                                                                                                                                                                                                                                                                                                                                                                                                                                                                                                                                                                                                       | Database |
|--------------------------------|-----------|---------|---------------------------------------------------------------------------------------------------------------------------------------------------------------------------------------------------------------------------------------------------------------------------------------------------------------------------------------------------------------------------------------------------------------------------------------------------------------------------------------------------------------------------------------------------------------------------------------------------------------------------------------------------------------------------------------------------------------------------------------------------------------------------------------------------------------------------------------------------------------------------------------------------------------------------------------------------------------------------------------------------------------------------------------------------------------------------------------------------------------------------------------------------------------------------------------------------------------------------------------------------------------------------------------------------------------------------------------------------------------------------------------------------------------------------------------------------------------------------------------------------------------------------------------------------------------------------------------------------------------------------------------------------------------------------------------------------------------------------------------------------------------------------------------------------------------------------------------------------------------------------------------------------------------------------------------------------------------------------------------------------------------------------------------------------------------------------------------------------------------------------------------------------------------------------------------------------------------------------------------------------------------------------------------------------------------------------------------------------------------------------------------------------------------------------------------------------------------------------------------------------------------------------------------------------------------------------------------------------------------------------------------------------------------------------------------------------------------------------------------------------------------------------------------------------------------------------------------------------------------------------------------------------------------------------------------------------------------------------------------------------------------------------------------------------------------------------------------------------------------------------------------------------------------------------------------------------------------------------------------------------------------------------------------------------------------------------------------------------------------------------------------------------------------------------------------------------------------------------------------------------------------------------------------------|----------|
| Regulation of cellular process | 605/10484 | 0.00027 | <p>AAK1.ACER2.ACSL4.ACTR1A.ACVR1B.ADAM22.ADARB1.ADIPOR2.ADORA2A.ADRBK2.AHI1.AICDA.AIFM2.AKAP2.ALCAM.ALOX15B.AMOTL1.ANKRD6.AP1G1.APOBEC3C.APOPT1.ARAF.ARFIP2.ARHGEF10L.ARHGEF28.ARL6IP1.ARRB1.ATAT1.ATCAY.ATF5.ATOH8.ATP6V1H.ATP8A2.ATXN3.BACH2.BARD1.BASP1.BDNF.BHLHE40.BLZF1.BORA.BSN.BTLA.BTRC.C12orf5.C2.C2CD2L.CA8.CABP4.CACNA1C.CACNA1G.CACNB3.CACNG8.CALCR.CAMK2G.CAMK4.CAMSAP1.CAMTA1.CAPZB.CAST.CBL.CBX2.CBX3.CCND2.CCR2.CD36.CD38.CD48.CD84.CDK12.CDK13.CDK14.CDK4.CDKN1B.CELF5.CERS3.CFLAR.CHD3.CHD5.CHMP4C.CHRNB2.CLEC2D.CLN8.CLSPN.CMKLR1.COMMD10.CORO2A.COX17.CPSF7.CREB1.CREB5.CSF2RA.CSRNP3.CTC1.CTH.CTSB.CXCL14.CYCS.CYLD.CYTH1.DAK.DCAF6.DCN.DENND4A.DFFA.DHX36.DHX58.DIMT1.DIO2.DKC1.DLX1.DLX6.DNAJB5.DNAJC16.DTX4.DUOX2.DUXA.DVL3.DYRK1A.E2F3.EFNA5.EGR2.EHD1.EIF2A.EIF4B.EIF4E.EIF4EBP2.EIF5.ELAVL1.ELFN2.ELK1.ENSA.ENSG00000157654.ENSG00000173575.EP300.EPB41L5.EPHA6.EPHB2.EPS15.ERCC1.EREG.ERLIN2.ERN2.ESCO2.ETF1.EZH1.FADS1.FAM101B.FAM134C.FAM168A.FAM208A.FAM212B.FBXL5.FBXO6.FBXO9.FBXW11.FCRL2.FGFRL1.FKBP14.FKBP1B.FNDC5.FOXD3.FOXX2.FOXO4.FOXP1.FRAT2.FRMD6.FSHB.FTO.FZD4.GABRA4.GABRB3.GABRG2.GADD45B.GALP.GALR2.GATAD1.GATAD2B.GCM2.GDI1.GFPT1.GGNBP2.GIGYF2.GIT2.GJD4.GLE1.GLP1R.GLUD1.GNL3L.GOLPH3L.GOSR1.GPAM.GPD1L.GPR123.GPR155.GPR161.GPR182.GPR26.GRAP.GRASP.GRHL2.GRIN2B.GRIPAP1.GTF2H5.GTF2IRD2.GTF2IRD2B.HCAR1.HCFC1.HDAC8.HEY2.HILPDA.HOOK3.HOXA2.HOXA9.HPSE2.HSP90B1.IFIT5.IGF2.IGF2BP1.IGFBPL1.IKZF2.IL13RA1.IL1A.IL7.IMPACT.ING4.INHBB.INPP5A.INPP5B.IPO5.IRAK1.IRAK2.IST1.ITGAX.ITGB3.ITIH5.ITIH6.JAM2.KALRN.KCNB1.KCNIP1.KCNJ10.KCTD20.KCTD9.KDF1.KDM5B.KIAA0319.KIAA1161.KIAA1715.KLF12.KMT2A.KMT2D.KPNA1.KREMEN1.KSR2.LAMC2.LARP1.LARS.LASP1.LDLR.LEPROT.LILRB1.LIMD1.LIN52.LRPAP1.LRRC27.LRRC38.LRRN2.LTBP2.MAMLD1.MAP4K4.MAPK13.MAPT.MARVELD3.MAVS.MBTD1.MDM4.MECP2.METAP1.MGRN1.MID1IP1.MIXL1.MLXIP.MMP14.MOB1B.MPZL1.MR1.MTA3.MTCH2.MTMR4.MUC4.MYB.MYLK3.MYO5A.MYOCD.MYPN.MZF1.NAF1.NCOR1.NEDD8.NEIL1.NEK2.NETO2.NEUROD6.NFAT5.NISCH.NKD1.NKX24.NLK.NLN.NLRP7.NME6.NMT2.NOS1.NOVA2.NPAT.NPR3.NR1D2.NR2F2.NRCAM.NRXN3.NTRK2.OLIG2.ONECUT2.OTUD3.OTUD7B.P2RX7.P2RY8.PA2G4.PAFAH1B1.PAFAH2.PAK3.PARD3.PARP16.PATZ1.PAX5.PDAP1.PDCD4.PDE1C.PDE4C.PDE7A.PDIA6.PDK4.PDLIM5.PDP1.PEA15.PERP.PI15.PIAS2.PIGR.PIK3AP1.PIK3R1.PIK3R5.PIRT.PITPNM2.PKHD1.PKMYT1.PKP4.PLAG1.PLEKHA1.PLEKHG4B.PLP2.PLXNC1.POLDIP3.POLH.POLR2E.POU2F1.POU3F2.PPARGC1A.PPFIA3.PPP1R13B.PPP2R2A.PRDM11.PRICKLE2.PRKAR1A.PRKAR2B.PRKCA.PRKCB.PRR11.PRR2.PSAPL1.PSD3.PTCH1.PTGFR.PTGIS.PTK6.PTP4A1.PTPRN2.PURA.PVRL2.RAB11A.RAB12.RAB29.RAB3B.RAB7A.RAD23B.RAD51.RANBP9.RAP1GAP2.RASGEF1B.RASIP1.RASSF8.RBL1.RBPMS2.RC3H1.RHBDD1.RIMS2.RIOK2.RND2.RNF141.RNF146.RNF165.RORB.RQCD1.RRM2.RRP1B.RSU1.RUNX3.S1PR3.SAMD8.SAMHD1.SAP3OL.SBNO1.SCIN.SCN2B.SEH1L.SEMA3A.SEMA4F.SENP6.SETD5.SETD7.SGMS1.SH3BGRL.SH3GLB1.SH3TC2.SHC4.SIN3A.SKP1.SLA.SLAIN2.SLC20A1.SLC20A2.SLC24A2.SLC30A5.SLC35B4.SLC38A3.SLC6A4.SLC8A1.SLITRK2.SMAD4.SMARCC2.SMARCD1.SMC3.SOCS7.SOGA1.SORCS3.SP1.SP5.SPIB.SPN.SPOCK1.SPOPL.SPTLC2.SREK1.SRGAP3.SRSF2.SRSF3.SSR1.SSX1.ST7L.STAR.STAT4.STK39.STOX1.STRADA.STX1B.STX3.STX5.STYXL1.SUFU.SUMO1.SUSD5.SUV39H2.SYNGR1.SYNJ2BP.SYNPO2L.SYP.TACR1.TADA1.TAF5L.TBC1D13.TBC1D14.TBC1D22B.TBX15.TEAD1.TEK.TESK2.TET3.TEX2.TGFBR1.TGIF2.THAP8.TIMM50.TLK2.TMBIM4.TMEM108.TMEM170B.TMEM64.TMX3.TNC.TNF.TNFSF8.TNPO3.TNRC6A.TNRC6B.TNRC6C.TP53.TP53INP1.TP53INP2.TPBG.TRABD2B.TRAF6.TRIL.TRIM72.TRNAU1AP.TSPAN11.TSPYL5.TTC26.UBE2J1.UBXN2B.ULK2.UNKL.UPF1.USH1C.USH2A.USP13.UST.VAMP7.VAV2.VEGFA.VEZF1.V</p> | GO       |

|                                    |          |         |                                                                                                                                                                                                                                                                                                                                                                                                                                                                                                                                                                                                                                                                                                                                                                                                                                                                                                                                                                                                                                                                                                                                                                                                                                                                                                                                                                                                                                                                                                                                                                                                                                                                                                                                                                                                                                                                                                                                                                                                                                                                                                                                                                                                                                                                                                                                                                                                                                                                                                                                                                                                          |    |
|------------------------------------|----------|---------|----------------------------------------------------------------------------------------------------------------------------------------------------------------------------------------------------------------------------------------------------------------------------------------------------------------------------------------------------------------------------------------------------------------------------------------------------------------------------------------------------------------------------------------------------------------------------------------------------------------------------------------------------------------------------------------------------------------------------------------------------------------------------------------------------------------------------------------------------------------------------------------------------------------------------------------------------------------------------------------------------------------------------------------------------------------------------------------------------------------------------------------------------------------------------------------------------------------------------------------------------------------------------------------------------------------------------------------------------------------------------------------------------------------------------------------------------------------------------------------------------------------------------------------------------------------------------------------------------------------------------------------------------------------------------------------------------------------------------------------------------------------------------------------------------------------------------------------------------------------------------------------------------------------------------------------------------------------------------------------------------------------------------------------------------------------------------------------------------------------------------------------------------------------------------------------------------------------------------------------------------------------------------------------------------------------------------------------------------------------------------------------------------------------------------------------------------------------------------------------------------------------------------------------------------------------------------------------------------------|----|
|                                    |          |         | HL.VIPAS39.WDR36.WLS.WTAP.XBP1.ZADH2.ZBTB20.ZBTB4.ZBTB7A.ZBTB8A.ZC3H14.ZC3HAV1.ZEB1.ZFP14.ZFP30.ZFP91.ZFX.ZHX2.ZHX3.ZKSCAN1.ZMYM4.ZMYND8.ZNF131.ZNF160.ZNF182.ZNF189.ZNF229.ZNF25.ZNF317.ZNF331.ZNF335.ZNF33A.ZNF346.ZNF347.ZNF365.ZNF37A.ZNF426.ZNF430.ZNF440.ZNF445.ZNF454.ZNF460.ZNF483.ZNF486.ZNF490.ZNF500.ZNF514.ZNF555.ZNF557.ZNF568.ZNF592.ZNF625.ZNF696.ZNF700.ZNF711.ZNF773.ZNF791.ZNF793.ZNF805.ZNF84.ZNF865.ZW10.ZYG11A                                                                                                                                                                                                                                                                                                                                                                                                                                                                                                                                                                                                                                                                                                                                                                                                                                                                                                                                                                                                                                                                                                                                                                                                                                                                                                                                                                                                                                                                                                                                                                                                                                                                                                                                                                                                                                                                                                                                                                                                                                                                                                                                                                      |    |
| Regulation of metabolic process    | 402/6516 | 0.00032 | ACER2.ACVR1B.ADAM19.ADARB1.ADIPOR2.ADORA2A.AHI1.AICDA.ANKRD6.AOC3.APOPT1.ARAF.ARL6IP1.ARRB1.ATCAY.ATF5.ATOH8.ATP6V1H.ATXN3.BACH2.BARD1.BASP1.BDNF.BHLHE40.BLZF1.BTRC.C12orf5.C2.CALCR.CAMK4.CAMTA1.CAST.CBL.CBX2.CBX3.CCND2.CCR2.CD36.CD38.CDK12.CDK13.CDK4.CDKN1B.CELF5.CERS3.CFLAR.CHD3.CHD5.CHRNB2.CLN8.CLSPN.CMKLR1.COMMD10.COX17.CPSF7.CREB1.CREB5.CSRNP3.CTC1.CTH.CYCS.CYLD.CY P4A11.DCAF6.DCN.DENND4A.DFFA.DHX36.DIMT1.DIO2.DKC1.DLX1.DLX6.DNAJB5.DUXA.DVL3.DYRK1A.E2F3.EFNA5.EGR2.EIF2A.EIF4B.EIF4E.EIF4EBP2.EIF5.ELAVL1.ELFN2.ELK1.ENSA.ENSG00000173575.EP300.EPB41L5.EPHB2.EPS15.ERCC1.EREG.ERLIN2.ERN2.ESCO2.ETF1.EZH1.FADS1.FAM168A.FAM208A.FAM212B.FBXL5.FBXW11.FKBP1B.FOXD3.FOXX2.FOXO4.FOXP1.FSHB.FZD4.GADD45B.GALR2.GATAD1.GATAD2B.GCM2.GFPT1.GGNBP2.GIGYF2.GLE1.GNL3L.GPAM.GPD1L.GRHL2.GRIN2B.GTF2H5.GTF2IRD2.GTF2IRD2B.HCFC1.HDAC8.HEY2.HOXA2.HOXA9.HSP90B1.IGF2.IGF2BP1.IKZF2.IL1A.IL7.IMPACT.ING4.INHBB.INPP5B.IPO5.IRAK1.IRAK2.ITGB3.ITIH5.ITIH6.KCTD20.KDM5B.KLF12.KMT2A.KMT2D.KPNA1.KSR2.LACTB.LARP1.LARS.LDLR.LILRB1.LIMD1.LRPAP1.MAMLD1.MAP4K4.MAPK13.MAPT.MARVELD3.MAVS.MBTD1.MDM4.MECP2.METAP1.MID1IP1.MIXL1.MLXIP.MMP14.MOB1B.MTA3.MTMR4.MYB.MYOC.D.MZF1.NAF1.NCOR1.NEDD8.NEIL1.NEK2.NEUROD6.NFAT5.NKD1.NKX24.NLK.NLN.NLRP7.NOS1.NOVA2.NPAT.NPR3.NR1D2.NR2F2.NTRK2.OLIG2.ONECUT2.OPA3.OTUD7B.P2RX7.PA2G4.PAFAH1B1.PAK3.PAN2.PARD3.PARP16.PATZ1.PAX5.PDCD4.PDK4.PDP1.PEA15.PERP.PI15.PIAS2.PIK3R1.PIK3R5.PKHD1.PKMYT1.PLAG1.POLDIP3.POLH.POLR2E.POU2F1.POU3F2.PPARGC1A.PPP2R2A.PRDM11.PRKAR1A.PRKAR2B.PRKCA.PRKCB.PSAPL1.PTCH1.PTGRF.PTGIS.PTK6.PURA.RAB12.RAB29.RAB7A.RAD23B.RAD51.RANBP9.RASIP1.RBL1.RBPMS2.RC3H1.RHBDD1.RIMS2.RIOK2.RNF141.RNF165.RORB.RQCD1.RRM2.RRP1B.RUNX3.SAMD7.SAMD8.SAP30L.SBNO1.SEMA3A.SETD5.SETD7.SH3GLB1.SHC4.SIN3A.SLC35B4.SLC38A3.SLC6A4.SMAD4.SMARCC2.SMARCD1.SMC3.SOCS7.SOGA1.SP1.SP5.SPIB.SPN.SPOCK1.SPOPL.SPTLC2.SREK1.SRSF2.SRSF3.SSX1.STAR.STAT4.STK39.STOX1.STRADA.STX1B.STX5.STYXL1.SUFU.SUMO1.SUV39H2.SYNJ2BP.TADA1.TAF5L.TBC1D14.TBX15.TEAD1.TEK.TET3.TGFBR1.TGIF2.THAP8.TLK2.TNC.TNF.TNFSF8.TNRC6A.TNRC6B.TNRC6C.TP53.TP53INP1.TP53INP2.TRABD2B.TRAF6.TRNAU1AP.TSPYL5.UBE2J1.UBXN2B.UNKL.UPF1.USP13.VAV2.VEGFA.VEZF1.VHL.VIPAS39.WTAP.XBP1.ZBTB20.ZBTB4.ZBTB7A.ZBTB8A.ZC3H14.ZC3HAV1.ZEB1.ZFP14.ZFP30.ZFP91.ZFX.ZHX2.ZHX3.ZKSCAN1.ZMYM4.ZMYND8.ZNF131.ZNF160.ZNF182.ZNF189.ZNF229.ZNF25.ZNF317.ZNF331.ZNF335.ZNF33A.ZNF346.ZNF347.ZNF365.ZNF37A.ZNF426.ZNF430.ZNF440.ZNF445.ZNF454.ZNF460.ZNF483.ZNF486.ZNF490.ZNF500.ZNF514.ZNF555.ZNF557.ZNF568.ZNF592.ZNF625.ZNF696.ZNF700.ZNF711.ZNF773.ZNF791.ZNF793.ZNF805.ZNF84.ZNF865.ZYG11A | GO |
| Regulation of biosynthetic process | 278/4337 | 0.0014  | ACER2.ACVR1B.ADIPOR2.ADORA2A.AHI1.AICDA.ARRB1.ATF5.ATOH8.ATXN3.BACH2.BASP1.BHLHE40.BLZF1.BTRC.C12orf5.CAMK4.CAMTA1.CBL.CBX2.CBX3.CCR2.CD36.CD38.CDK12.CDK13.CDK4.CDKN1B.CERS3.CFLAR.CHD3.CHD5.CMKLR1.COMMD10.CREB1.CREB5.CSRNP3.CTC1.CTH.CYLD.DCAF6.DCN.DENND4A.DHX36.DIO2.DKC1.DLX1.DLX6.DNAJB5.DUXA.DVL3.E2F3.EGR2.EIF2A.EIF4B.EIF4E.EIF4EBP2.EIF5.ELAVL1.ELK1.ENSG00000173575.EP300.EREG.ERLIN2.ERN2.ESCO2.ETF1.EZH1.FADS1.FAM208A.FBXW11.FOXD3.FOXX2.FOXO4.FOXP1.FSHB.FZD4.GALR2.GATA1.GATAD2B.GCM2.GIGYF2.GLE1.GNL3L.GPAM.GRHL2.GTF2H5.GTF2IRD2.GTF2IRD2B.HCFC1.HDAC8.HEY2.HOXA2.HOXA9.IGF2.IGF2BP1.IKZF2.IL1A.IMPACT.ING4.INHBB.IRAK1.IRAK2.ITGB3.KDM5B.KLF12.KMT2A.KMT2D.LARP1.LDLR.LILRB1.LIMD1.MAMLD1.MAPK13.MAVS.MBTD1.MDM4.MECP2.METAP1.MID1IP1.MIXL1.MLXIP.MTA3.MYB.MYOC.M                                                                                                                                                                                                                                                                                                                                                                                                                                                                                                                                                                                                                                                                                                                                                                                                                                                                                                                                                                                                                                                                                                                                                                                                                                                                                                                                                                                                                                                                                                                                                                                                                                                                                                                                                                                                                   | GO |



|                                            |          |        |                                                                                                                                                                                                                                                                                                                                                                                                                                                                                                                                                                                                                                                                                                                                                                                                                                                                                                                                                                                                                                                                                                                                                                                                                                                                                                                                                                                                                                                                                                                                                                                                                                   |    |
|--------------------------------------------|----------|--------|-----------------------------------------------------------------------------------------------------------------------------------------------------------------------------------------------------------------------------------------------------------------------------------------------------------------------------------------------------------------------------------------------------------------------------------------------------------------------------------------------------------------------------------------------------------------------------------------------------------------------------------------------------------------------------------------------------------------------------------------------------------------------------------------------------------------------------------------------------------------------------------------------------------------------------------------------------------------------------------------------------------------------------------------------------------------------------------------------------------------------------------------------------------------------------------------------------------------------------------------------------------------------------------------------------------------------------------------------------------------------------------------------------------------------------------------------------------------------------------------------------------------------------------------------------------------------------------------------------------------------------------|----|
|                                            |          |        | ZF1.NAF1.NCOR1.NEDD8.NEK2.NEUROD6.NFAT5.NK24.NLK.NLN.NOS1.NPAT.NR1D2.NR2F2.OLIG2.ONECUT2.OTUD7B.P2RX7.PA2G4.PAK3.PATZ1.PAX5.PDCD4.PDK4.PDP1.PIAS2.PIK3R1.PKHD1.PLAG1.POLDIP3.POU2F1.POU3F2.PPARGC1A.PRDM11.PRKAR1A.PRKCB.PTCH1.PTGIS.PURA.RBL1.RBPMS2.RC3H1.RNF141.RNF165.RORB.RQCD1.RRM2.RRP1B.RUNX3.SAMD8.SAP30L.SBNO1.SETD5.SETD7.SIN3A.SLC35B4.SLC38A3.SMAD4.SMARCC2.SMARCD1.SMC3.SOGA1.SP1.SP5.SPIB.SPN.SRSF2.SSX1.STAR.STAT4.STOX1.SUFU.SUMO1.SUV39H2.TADA1.TAF5L.TBX15.TEAD1.TET3.TGFBR1.TGIF2.THAP8.TNF.TNFSF8.TNRC6A.TNRC6B.TNRC6C.TP53.TP53INP1.TP53INP2.TRAF6.TRNAU1AP.UBE2J1.UNKL.UPF1.USP13.VEGFA.VEZF1.VHL.VIPAS39.XBP1.ZBTB20.ZBTB4.ZBTB7A.ZBTB8A.ZEB1.ZFP14.ZFP30.ZFP91.ZFX.ZHX2.ZHX3.ZKSCAN1.ZMYM4.ZMYND8.ZNF131.ZNF160.ZNF182.ZNF189.ZNF229.ZNF25.ZNF317.ZNF331.ZNF335.ZNF33A.ZNF347.ZNF365.ZNF37A.ZNF426.ZNF430.ZNF440.ZNF445.ZNF454.ZNF460.ZNF483.ZNF486.ZNF490.ZNF500.ZNF514.ZNF555.ZNF557.ZNF568.ZNF592.ZNF625.ZNF696.ZNF700.ZNF711.ZNF773.ZNF791.ZNF793.ZNF805.ZNF84.ZNF865                                                                                                                                                                                                                                                                                                                                                                                                                                                                                                                                                                                                                                |    |
| Regulation of RNA metabolic process        | 253/3890 | 0.0014 | ACVR1B.ADORA2A.AHI1.AICDA.ARRB1.ATF5.ATOH8.ATXN3.BACH2.BARD1.BASP1.BHLHE40.BLZF1.BTRC.CAMK4.CAMTA1.CBL.CBX2.CBX3.CD36.CD38.CDK12.CDK13.CDKN1B.CELF5.CERS3.CFLAR.CHD3.CHD5.CMKLR1.COMMD10.CPSF7.CREB1.CREB5.CSRNP3.CTH.CYLD.DCAF6.DCN.DENND4A.DHX36.DIMT1.DKC1.DLX1.DLX6.DNAJB5.DUXA.DVL3.DYRK1A.E2F3.EGR2.EIF2A.ELAVL1.ELK1.ENSG0000173575.EP300.EREG.ERLIN2.ERN2.EZH1.FADS1.FAM208A.FBXW11.FOXP3.FOXP4.FOXP1.FSHB.FZD4.GALR2.GATAD1.GATAD2B.GCM2.GIGYF2.GRHL2.GTF2H5.GTF2IRD2.GTF2IRD2B.HCFC1.HDAC8.HEY2.HOXA2.HOXA9.IGF2.IGF2BP1.IKZF2.IL1A.IMPACT.ING4.IRAK1.IRAK2.KDM5B.KLF12.KMT2A.KMT2D.LARP1.LILRB1.LIMD1.MAMLD1.MAPK13.MAVS.MBTD1.MDM4.MECP2.MIXL1.MLXIP.MTA3.MYB.MYOC.D.MZF1.NAF1.NCOR1.NEDD8.NEUROD6.NFAT5.NKX24.NLK.NOS1.NOVA2.NPAT.NR1D2.NR2F2.OLIG2.ONECUT2.OTUD7B.PA2G4.PATZ1.PAX5.PDCD4.PIAS2.PIK3R1.PKHD1.PLAG1.POU2F1.POU3F2.PPARGC1A.PRDM11.PRKAR1A.PRKCA.PRKCB.PTCH1.PTGIS.PURA.RBL1.RBPMS2.RC3H1.RIOK2.RNF141.RNF165.RORB.RQCD1.RRM2.RRP1B.RUNX3.SAP30L.SBNO1.SETD5.SETD7.SIN3A.SLC38A3.SMAD4.SMARCC2.SMARCD1.SP1.SP5.SPIB.SREK1.SRSF2.SRSF3.SSX1.STAT4.STOX1.SUFU.SUMO1.SUV39H2.TADA1.TAF5L.TBX15.TEAD1.TET3.TGFBR1.TGIF2.THAP8.TNF.TNFSF8.TNRC6B.TNRC6C.TP53.TP53INP1.TP53INP2.TRAF6.UNKL.UPF1.USP13.VEGFA.VEZF1.VHL.VIPAS39.WTAP.XBP1.ZBTB20.ZBTB4.ZBTB7A.ZBTB8A.ZC3H14.ZC3HAV1.ZEB1.ZFP14.ZFP30.ZFP91.ZFX.ZHX2.ZHX3.ZKSCAN1.ZMYM4.ZMYND8.ZNF131.ZNF160.ZNF182.ZNF189.ZNF229.ZNF25.ZNF317.ZNF331.ZNF335.ZNF33A.ZNF347.ZNF37A.ZNF426.ZNF430.ZNF440.ZNF445.ZNF454.ZNF460.ZNF483.ZNF486.ZNF490.ZNF500.ZNF514.ZNF555.ZNF557.ZNF568.ZNF592.ZNF625.ZNF696.ZNF700.ZNF711.ZNF773.ZNF791.ZNF793.ZNF805.ZNF84.ZNF865 | GO |
| Regulation of transcription. DNA-templated | 229/3661 | 0.0186 | ACVR1B.ADORA2A.AHI1.AICDA.ARRB1.ATF5.ATOH8.ATXN3.BACH2.BASP1.BHLHE40.BLZF1.BTRC.CAMK4.CAMTA1.CBL.CBX2.CBX3.CD36.CD38.CDK12.CDK13.CDKN1B.CERS3.CFLAR.CHD3.CHD5.CMKLR1.COMMD10.CREB1.CREB5.CSRNP3.CTH.CYLD.DCAF6.DCN.DENND4A.DHX36.DLX1.DLX6.DNAJB5.DUXA.DVL3.E2F3.EGR2.EIF2A.ELK1.ENSG000173575.EP300.EREG.ERLIN2.ERN2.EZH1.FADS1.FAM208A.FBXW11.FOXP3.FOXP4.FOXP1.FSHB.FZD4.GALR2.GATAD1.GATAD2B.GCM2.GRHL2.GTF2H5.GTF2IRD2.GTF2IRD2B.HCFC1.HDAC8.HEY2.HOXA2.HOXA9.IGF2.IKZF2.IL1A.IMPACT.ING4.IRAK1.IRAK2.KDM5B.KLF12.KMT2A.KMT2D.LILRB1.LIMD1.MAMLD1.MAPK13.MAVS.MBTD1.MDM4.MECP2.MIXL1.MLXIP.MTA3.MYB.MYOC.D.MZF1.NAF1.NCOR1.NEDD8.NEUROD6.NFAT5.NKX24.NLK.NOS1.NPAT.NR1D2.NR2F2.OLIG2.ONECUT2.OTUD7B.PA2G4.PATZ1.PAX5.PDCD4.PIAS2.PIK3R1.PKHD1.PLAG1.POU2F1.POU3F2.PPARGC1A.PRDM11.PRKAR1A.PRKCB.PTCH1.PTGIS.PURA.RBL1.RBPMS2.RNF141.RNF165.RORB.RQCD1.RRM2.RRP1B.RUNX3.SAP30L.SBNO1.SETD5.SETD7.SIN3A.SLC38A3.SMAD4.SMARCC2.SMARCD1.SP1.SP5.SPIB.SSX1.STAT4.STOX1.SUFU.SUMO1.SUV39H2.TADA1.TAF5L.TBX15.TEAD1.TET3.TGFBR1.TGIF2.THAP8.TNF.TNFSF8.TP53.TP53INP1.TP53INP2.TRAF6.UNKL.USP13.VEGFA.VEZF1.VHL.VIPAS39.XBP1.ZBTB20.ZBTB4.ZBTB7A.ZBTB8A.ZEB1.ZFP14.ZFP30.ZFP91.ZFX.ZHX2.ZHX3.ZKSCAN1.ZMYM4.ZMYND8.ZNF131.ZNF160.ZNF182.ZNF189.ZNF229.ZNF25.ZNF317.ZNF331.ZNF335.ZNF33A.ZNF347.ZNF37A.ZNF426.ZNF430.ZNF440.ZNF445.ZNF454.ZNF460.ZNF483.ZNF486.ZNF490.ZNF500.ZNF514.ZNF555.ZNF557.ZNF568.ZNF592.ZNF625.ZNF696.ZNF700.ZNF711.ZNF773.ZNF791.ZNF793.ZNF805.ZNF84.ZNF865                                                                                                                                                   | GO |

|                                              |           |                        |                                                                                                                                                                                                                                                                                                                                                                                                                                                                                                                                                                                                                                                                                                                                                                                                                                                                                                                                                                                                                                                                                                                                                                                                                                                                                                                                                                                                                                                                                                                                                                                                                                                                                                                                                                                                                                                                                                                                                                                                                                                                                                                                                                                                                                                                                                                                                                                                                                                                                                                                                                                                                                                                                                                                                                                                                                     |    |
|----------------------------------------------|-----------|------------------------|-------------------------------------------------------------------------------------------------------------------------------------------------------------------------------------------------------------------------------------------------------------------------------------------------------------------------------------------------------------------------------------------------------------------------------------------------------------------------------------------------------------------------------------------------------------------------------------------------------------------------------------------------------------------------------------------------------------------------------------------------------------------------------------------------------------------------------------------------------------------------------------------------------------------------------------------------------------------------------------------------------------------------------------------------------------------------------------------------------------------------------------------------------------------------------------------------------------------------------------------------------------------------------------------------------------------------------------------------------------------------------------------------------------------------------------------------------------------------------------------------------------------------------------------------------------------------------------------------------------------------------------------------------------------------------------------------------------------------------------------------------------------------------------------------------------------------------------------------------------------------------------------------------------------------------------------------------------------------------------------------------------------------------------------------------------------------------------------------------------------------------------------------------------------------------------------------------------------------------------------------------------------------------------------------------------------------------------------------------------------------------------------------------------------------------------------------------------------------------------------------------------------------------------------------------------------------------------------------------------------------------------------------------------------------------------------------------------------------------------------------------------------------------------------------------------------------------------|----|
|                                              |           |                        | 1.ZFX.ZHX2.ZHX3.ZKSCAN1.ZMYM4.ZMYND8.ZNF131.ZNF160.ZNF182.ZNF189.ZNF229.ZNF25.ZNF317.ZNF331.ZNF335.ZNF33A.ZNF347.ZNF37A.ZNF426.ZNF430.ZNF440.ZNF445.ZNF454.ZNF460.ZNF483.ZNF486.ZNF490.ZNF500.ZNF514.ZNF555.ZNF557.ZNF568.ZNF592.ZNF625.ZNF696.ZNF700.ZNF711.ZNF773.ZNF791.ZNF793.ZNF805.ZNF84.ZNF865                                                                                                                                                                                                                                                                                                                                                                                                                                                                                                                                                                                                                                                                                                                                                                                                                                                                                                                                                                                                                                                                                                                                                                                                                                                                                                                                                                                                                                                                                                                                                                                                                                                                                                                                                                                                                                                                                                                                                                                                                                                                                                                                                                                                                                                                                                                                                                                                                                                                                                                               |    |
| Positive regulation of RNA metabolic process | 113/1596  | 0.0193                 | ACVR1B.AHI1.AICDA.ARRB1.ATF5.ATOH8.BTRC.CAMK4.CAMTA1.CD38.CDK12.CDK13.CREB1.CREB5.CSRNP3.DCAF6.DCN.DHX36.DIMT1.DLX1.DVL3.DYRK1A.E2F3.EGR2.EIF2A.ELK1.EP300.ERLIN2.EZH1.FBXW11.FOXD3.FOXX2.FOXO4.FSHB.FZD4.GALR2.GCM2.GIGYF2.GRHL2.HCFC1.HEY2.HOXA2.IGF2.IKZF2.IL1A.ING4.IRAK1.KMT2A.KMT2D.LILRB1.MAVS.MECP2.MIXL1.MLXIP.MYB.MYOC.D.MZF1.NEUROD6.NFAT5.NOS1.NPAT.NR1D2.NR2F2.ONECUT2.PATZ1.PAX5.PIAS2.PIK3R1.PLAG1.POU2F1.POU3F2.PPARGC1A.PRKCB.PTCH1.RBL1.RC3H1.RIOK2.RORB.RQCD1.RRP1B.RUNX3.SETD7.SIN3A.SLC38A3.SMAD4.SMARCC2.SMARCD1.SP1.SPIB.STAT4.TADA1.TAF5L.TEAD1.TET3.TGFBR1.TNF.TNFSF8.TNRC6B.TNRC6C.TP53.TP53INP1.TP53INP2.TRAF6.UPF1.VEGFA.VEZF1.VHL.XBP1.ZC3HAV1.ZEB1.ZFX.ZNF131.ZNF711                                                                                                                                                                                                                                                                                                                                                                                                                                                                                                                                                                                                                                                                                                                                                                                                                                                                                                                                                                                                                                                                                                                                                                                                                                                                                                                                                                                                                                                                                                                                                                                                                                                                                                                                                                                                                                                                                                                                                                                                                                                                                                                                  | GO |
| Alternative splicing                         | 598/10223 | 2.19x10 <sup>-06</sup> | AAK1.ABCB9.ABHD12.ACER2.ACSL4.ACVR1B.ADAM19.ADAM22.ADARB1.AGAP1.AHI1.AICDA.AIFM2.AIFM3.AKIRIN1.AKR1D1.ALCAM.ALDH5A1.ALOX15B.ALPK1.ALS2CR12.AMN1.AMOTL1.ANKRD12.ANKRD6.AOC3.AP1G1.ARAF.ARFIP2.ARHGFEF10L.ARHGFEF28.ARL6IP1.ARMCI1.ARRB1.ARSA.ASTN2.ATAD3B.ATAT1.ATCAY.ATOH8.ATP2B3.ATP6V1H.ATP8A2.ATXN3.B3GNT6.BARD1.BASP1.BDNF.BEST3.BLZF1.BORA.BSDC1.BTLA.BTRC.BZRAP1.C19orf12.C1orf177.C1orf198.C2.C2CD2L.C5orf38.C8orf59.CABP4.CACNA1C.CACNA1G.CACNB3.CALCR.CALML4.CAMK2G.CAMSAP1.CAMTA1.CAPZB.CAST.CBX2.CCDC142.CCDC25.CCND2.CCR2.CD22.CD36.CD38.CD48.CD84.CDK12.CDK13.CDK14.CDK4.CELF5.CEP68.CERS5.CFLAR.CHD3.CHKA.CLEC2D.CLIC5.CLSPN.CLVS1.CMKLR1.CNTLN.CNTNAP2.CORO2B.CPD.CPSF7.CREB1.CREB5.CROT.CSF2RA.CSRNP3.CTC1.CTH.CYLD.CYP20A1.CYP4A11.CYP4A22.CYP4X1.CYTH1.DAK.DCAF10.DCAF5.DCAF6.DCN.DDOST.DENND4A.DENND5B.DFFA.DHX36.DKC1.DLX1.DLX6.DNAJB5.DNAJC16.DSG1.DTX4.DUSP13.DVL3.DYRK1A.DZANK1.E2F3.EGR2.EIF2A.EIF4B.ELAVL1.ELK1.EMC1.ENSG00000157654.ENSG00000173575.ENTPD1.EPB41L5.EPHA6.EPHB2.EPS15.ERCC1.ERLIN2.ESCO2.ETF1.EZH1.FADS1.FADS6.FAM102B.FAM126A.FAM133B.FAM134C.FAM168A.FAM168B.FAM208A.FAM227A.FAM32A.FAM63B.FAM73A.FAM73B.FBXL5.FBXO9.FBXW11.FCRL2.FCRL5.FKBP1B.FNDC5.FOPNL.FOXX2.FOXO4.FOXP1.FREM2.FRMD6.FTO.GABRB3.GABRG2.GALNT1.GALP.GDPD1.GFPT1.GGNBP2.GGT6.GIGYF2.GIT2.GK5.GLB1L.GLE1.GLT1D1.GLUD1.GLYCTK.GOLGA7.GOLPH3L.GOSR1.GPATCH2L.GPATCH8.GPR107.GPR123.GPR161.GRAMD1B.GRASP.GREB1.GRHL2.GRIPAP1.GSG1L.GTF2IRD2.GTF2IRD2B.HCF1.HDAC8.HEATR3.HN1L.HNRNPH3.HPSE2.ICA1L.IFIT5.IGF2.IGF2BP1.IKZF2.IL13RA1.IL7.IMPACT.ING4.INPP5B.IPO5.IRAK1.ISCU.IST1.ITGB3.ITIH5.JAM2.KALRN.KANK4.KCND1.KCNJ3.KCTD20.KCTD3.KDM5B.KIAA0319.KIAA1715.KIF1A.KLF12.KMT2A.KMT2D.KREMEN1.KSR2.LACTB.LAMC2.LARP1.LARP7.LARS.LASP1.LDLR.LILRB1.LRRC27.LRRC74B.MAMDC2.MAMLD1.MAP4K4.MAPK13.MAPT.MARC2.MARCH6.MAVS.MBTD1.MDGA1.MDM4.MECP2.METTTL2A.MGRN1.MGST2.MIXL1.MLC1.MLXIP.MMP16.MOB1B.MPZL1.MR1.MRPL4.MTA3.MTUS2.MUC4.MYB.MYLK3.MYO5A.MYOC.D.MYO3.MYPN.MZF1.NAF1.NBPF3.NCAM2.NCOR1.NDC1.NEK2.NEMF.NETO2.NFASC.NFAT5.NIPAL3.NISCH.NLRP7.NME6.NMNAT2.NOS1.NPR3.NR2F2.NRCAM.NRXN3.NSL1.NTRK2.NUBPL.NWD1.OSBPL9.OTUD7B.P2RX7.PA2G4.PAFAH1B1.PAK3.PAN2.PANK1.PARD3.PARD3B.PARP11.PARP16.PATZ1.PAX5.PCYOX1.PCYT1B.PDCD4.PDDC1.PDE1C.PDE4C.PDE7A.PDIA6.PDLIM5.PDP1.PEA15.PGPEP1.PHF3.PIAS2.PIK3AP1.PIK3R1.PIK3R5.PITPNM2.PKHD1.PKMYT1.PKP4.PLAG1.PLEKHA1.PLEKHM3.PLOD1.PLP2.PLXDC1.PNPO.POF1B.POLDIP3.POLH.POM121.POM121C.POU2F1.PPARGC1A.PPFIA3.PPM1K.PPP1R3A.PPP2R2A.PRDM11.PRKAR1A.PRKCB.PRR3.PRRT2.PSD3.PSTPIP2.PTCH1.PTGRF.PTK6.PTNRN2.PVRL2.PXMP4.PYCR1.R3HCC1L.RAB11A.RAB29.RAB3IP.RAD23B.RANBP9.RAP1GAP2.RASGEF1B.RASSF8.RBL1.RBM48.RBPMS2.RC3H1.RHBDD1.RIMS2.RINL.RIOK2.RNF135.RNF141.RNF146.RNF165.RPRD2.RQCD1.RRM2.RRP1B.RSU1.RUNDC3B.RUNX3.SAMD14.SAMD8.SAMHD1.SAP30L.SAYS1.SBF1.SBNO1.SCARA3.SCD5.SCIN.SCRN3.SD | KW |

|                                     |          |        |                                                                                                                                                                                                                                                                                                                                                                                                                                                                                                                                                                                                                                                                                                                                                                                                                                                                                                                                                                                                                                                                                                                                                                                                                                                                                                                                                                                                                                                                                                                                                                                                                                                                                                                                                                                                                                                                                                                                                                                                                                                                                                                                                                                                                                                                                                                                                                                                                                       |    |
|-------------------------------------|----------|--------|---------------------------------------------------------------------------------------------------------------------------------------------------------------------------------------------------------------------------------------------------------------------------------------------------------------------------------------------------------------------------------------------------------------------------------------------------------------------------------------------------------------------------------------------------------------------------------------------------------------------------------------------------------------------------------------------------------------------------------------------------------------------------------------------------------------------------------------------------------------------------------------------------------------------------------------------------------------------------------------------------------------------------------------------------------------------------------------------------------------------------------------------------------------------------------------------------------------------------------------------------------------------------------------------------------------------------------------------------------------------------------------------------------------------------------------------------------------------------------------------------------------------------------------------------------------------------------------------------------------------------------------------------------------------------------------------------------------------------------------------------------------------------------------------------------------------------------------------------------------------------------------------------------------------------------------------------------------------------------------------------------------------------------------------------------------------------------------------------------------------------------------------------------------------------------------------------------------------------------------------------------------------------------------------------------------------------------------------------------------------------------------------------------------------------------------|----|
|                                     |          |        | HD.SEC22C.SEH1L.SEMA4F.SENP6.SETD5.SGMS1.SH3GLB1.SH3TC2.SHC4.SIGLEC10.SIRPB2.SKP1.SLA.SLC12A5.SLC16A14.SLC1A2.SLC22A2.SLC24A2.SLC25A26.SLC25A30.SLC30A5.SLC35A2.SLC35B4.SLC35D1.SLC35E1.SLC39A14.SLC43A2.SLC4A4.SLC6A4.SLC8A1.SLITRK2.SMARCC2.SMARCD1.SMC2.SNAP23.SNRPD3.SNX7.SOCS7.SOGA1.SP1.SPIB.SPTLC3.SREK1.SRGAP3.SRSF2.SRSF3.SSR1.ST6GAL1.ST6GAL2.ST7L.STK39.STOX1.STRADA.STX1B.STX3.STX5.STYXL1.SUFU.SUMO1.SUV39H2.SV2B.SYNGR1.SYNPO2L.SYP.SZRD1.TACR1.TAF5L.TBC1D13.TBC1D14.TBX15.TDRP.TEAD1.TECPR1.TEK.TESK2.TET3.TEX2.TGFBR1.TGIF2.TIMM50.TLK2.TMC7.TMED4.TMEM108.TMEM116.TMEM168.TMEM245.TMEM44.TMEM64.TMEM87A.TMPPE.TMPRSS11A.TMX3.TNC.TNPO3.TNRC6A.TNRC6B.TNRC6C.TNS1.TP53.TP53INP1.TRIM47.TRIM66.TRIM72.TRNAU1AP.TSPEAR.TTC13.TTC26.TUFT1.UBE3B.UNKL.UPF1.USB1.USH1C.USH2A.USP13.USP31.USP49.VAMP7.VAV2.VEGFA.VHL.VIPAS39.VPS53.VTA1.VT11A.WLS.WTAP.XBP1.XPNPEP3.XXYLT1.ZADH2.ZBTB20.ZBTB8A.ZC3H14.ZC3HAV1.ZCCHC3.ZEB1.ZFP91.ZFR2.ZFX.ZHX3.ZMYM4.ZMYND8.ZNF131.ZNF160.ZNF182.ZNF189.ZNF229.ZNF25.ZNF317.ZNF335.ZNF33A.ZNF346.ZNF347.ZNF365.ZNF460.ZNF483.ZNF500.ZNF555.ZNF557.ZNF568.ZNF625.ZNF711.ZNF773.ZNF791.ZNF793.ZNF805.ZW10.ZYG11A                                                                                                                                                                                                                                                                                                                                                                                                                                                                                                                                                                                                                                                                                                                                                                                                                                                                                                                                                                                                                                                                                                                                                                                                                                                                              |    |
| Response to oxygen levels           | 33/321   | 0.0202 | C12orf5.CACNB3.CBL.CD38.CDK4.CDKN1B.CFLAR.CHRNB2.CREB1.EP300.HILPDA.HSP90B1.IRAK1.LIMD1.MDM4.MECP2.MMP14.MYB.MYOC.D.NOS1.PLOD1.PPARGC1A.PTGIS.SLC6A4.SLC8A1.SMAD4.STOX1.SUV39H2.TEK.TMEM199.TP53.VEGFA.VHL                                                                                                                                                                                                                                                                                                                                                                                                                                                                                                                                                                                                                                                                                                                                                                                                                                                                                                                                                                                                                                                                                                                                                                                                                                                                                                                                                                                                                                                                                                                                                                                                                                                                                                                                                                                                                                                                                                                                                                                                                                                                                                                                                                                                                            | GO |
| Nitrogen compound metabolic process | 469/8349 | 0.0277 | AAK1.ABHD12.ACER2.ACSL4.ACVR1B.ADAM19.ADAM22.ADARB1.ADORA2A.ADPRH.ADRBK2.AICDA.ALDH5A1.ALPK1.AOC3.APOBEC3C.ARAF.ARRB1.ARSA.ATAT1.ATF5.ATOH8.ATXN3.B3GALT6.B3GNT6.B4GALT5.BACH2.BARD1.BHLHE40.BTRC.C2.CAMK2G.CAMK4.CAMTA1.CBL.CBX2.CBX3.CD36.CD38.CDK12.CDK13.CDK14.CDK4.CDKN1B.CELF5.CERS3.CERS5.CFLAR.CHD3.CHD5.CHKA.CHMP4C.CLN8.CLSPN.COMMD10.CPD.CPM.CPSF7.CREB1.CREB5.CROT.CSF2RA.CSRNP3.CTC1.CTH.CTSB.CYCS.CYLD.CYP3A4.DCAF10.DCAF5.DCAF6.DCN.DDOST.DDX51.DEGS1.DENND4A.DFFA.DHTKD1.DHX36.DIMT1.DIO2.DKC1.DLX1.DNPEP.DTX4.DUOX2.DUSP13.DUXA.DYRK1A.E2F3.EGR2.EIF2A.EIF4B.EIF4E.EIF4EBP2.EIF5.ELAVL1.ELK1.ELOVL3.ENSG00000173575.ENTPD1.EP300.EPHA6.EPHB2.ERCC1.EREG.ERLIN2.ERN2.ESCO2.ETF1.EZH1.FAM208A.FAM63B.FBXL5.FBXO6.FBXO9.FBXW11.FGFRL1.FKBP14.FKBP1B.FMO2.FOXD3.FOXK2.FOXO4.FOXP1.FSHB.FTO.FUT1.GALNT1.GALNT6.GAN.GATAD2B.GCM2.GDPD1.GEMIN8.GFPT1.GGT6.GIGYF2.GINS1.GLUD1.GLYCTK.GOLGA7.GOLGA7B.GPAM.GPD1L.GRAP.GRHL2.GRIN2B.GTF2H5.GTF2IRD2.GTF2IRD2B.H6PD.HCFC1.HDAC8.HEY2.HNRNPH3.HOXA2.HOXA9.HPSE2.HSP90B1.IBA57.ICMT.IGF2.IKZF2.ING4.IRAK1.IRAK2.ISCU.ITIH5.ITIH6.KALRN.KCTD9.KDM5B.KLF12.KLHDC7A.KMT2A.KMT2D.KPNA1.KSR2.LACTB.LARP1.LARP7.LARS.LDLR.LIMD1.LIN52.MAMLD1.MAP4K4.MAPK13.MAPT.MARC2.MARCH6.MBD6.MBTD1.MDM4.MECP2.METAP1.METTTL2A.MGAT2.MGAT3.MGRN1.MGST2.MIXL1.MLXIP.MMP13.MMP14.MMP16.MRPL27.MRPL36.MRPL4.MRPL57.MTA3.MTMR4.MUC4.MYB.MYLK3.MYOC.D.MZF1.NAF1.NCOR1.NDUFA4.NEDD8.NEIL1.NEK2.NEUROD6.NFAT5.NLK.NLN.NME6.NMNAT1.NMNAT2.NMT2.NOS1.NOVA2.NPAT.NR1D2.NR2F2.NTRK2.NWD1.OLIG2.ONECUT2.OTUD3.OTUD7B.P2RX7.PA2G4.PAFAH1B1.PAK3.PAN2.PANK1.PAPPA.PARP16.PATZ1.PAX5.PCYOX1.PCYT1A.PCYT1B.PDE4C.PDE7A.PDIA6.PDK4.PDP1.PEA15.PERP.PGPEP1.PHF3.PIAS2.PIK3R1.PIPOX.PKMYT1.PLAG1.PLOD1.PNPO.POLDIP3.POLH.POLR2E.POU2F1.POU3F2.PPARGC1A.PPM1K.PPP2R2A.PRDM11.PRKCA.PRKCB.PSAPL1.PSMB6.PTAR1.PTCH1.PTGIS.PTK6.PTP4A1.PTPRN2.PURA.PYCRL.RAB11A.RAB12.RAB3B.RAB7A.RAD23B.RAD51.RAD54L.RANBP9.RBL1.RC3H1.RHBDD1.RIOK2.RNASEH1.RNF135.RNF141.RNF146.RNF165.RORB.RPP14.RPRD2.RQCD1.RRM2.RRP1B.RUNX3.SAMD8.SAMHD1.SAP30L.SBF1.SCD5.SCRN3.SDF2.SDHD.SENP6.SEPHS2.SETD5.SETD7.SGMS1.SIN3A.SKP1.SLA.SLC19A3.SLC25A15.SLC35D1.SMAD4.SMARCC2.SMC3.SNRPD3.SOCS7.SP1.SP5.SPIB.SPOPL.SPTLC2.SPTLC3.SREK1.SREK1IP1.SRSF2.SRSF3.SSX1.ST3GAL3.ST6GAL1.ST6GAL2.STAT4.STK39.STOX1.STYXL1.SUFU.SUMO1.SUV39H2.TADA1.TAF5L.TBX15.TEAD1.TEK.TESK2.TET3.TEX2.TGFBR1.TGIF2.THUMP3.TIMM50.TLK2.TMEM199.TMPRSS11A.TMX3.TNC.TNF.TP53. | GO |

|                                           |          |        |                                                                                                                                                                                                                                                                                                                                                                                                                                                                                                                                                                                                                                                                                                                                                                                                        |          |
|-------------------------------------------|----------|--------|--------------------------------------------------------------------------------------------------------------------------------------------------------------------------------------------------------------------------------------------------------------------------------------------------------------------------------------------------------------------------------------------------------------------------------------------------------------------------------------------------------------------------------------------------------------------------------------------------------------------------------------------------------------------------------------------------------------------------------------------------------------------------------------------------------|----------|
|                                           |          |        | TP53INP1.TP53INP2.TRABD2B.TRAF6.TRIM72.TRMT12.TRNAU1AP.TRPM7.TSR1.TTLL12.UBE2E3.UBE2J1.UBE3B.UBXN2B.ULK2.UNKL.UPF1.USB1.USP13.USP31.USP49.UST.UTP14C.VAPA.VEZF1.VHL.VIPAS39.WDR36.WTAP.XBP1.XPNPEP3.XXYLT1.ZBTB20.ZBTB4.ZBTB7A.ZBTB8A.ZDHHC22.ZDHHC23.ZEB1.ZFP14.ZFP30.ZFP91.ZFX.ZHX2.ZHX3.ZKSCAN1.ZMAT2.ZMYND8.ZNF131.ZNF160.ZNF182.ZNF189.ZNF229.ZNF25.ZNF317.ZNF331.ZNF335.ZNF33A.ZNF347.ZNF365.ZNF37A.ZNF426.ZNF430.ZNF440.ZNF445.ZNF454.ZNF460.ZNF483.ZNF486.ZNF490.ZNF500.ZNF514.ZNF555.ZNF557.ZNF568.ZNF592.ZNF625.ZNF696.ZNF700.ZNF711.ZNF773.ZNF791.ZNF793.ZNF793.ZNF805.ZNF84.ZNF865.ZYG11A                                                                                                                                                                                                  |          |
| DNA-binding transcription factor activity | 125/1749 | 0.0102 | ATF5.ATOX1B.BACH2.BHLHE40.BLZF1.CAMTA1.CBL.CERS3.CREB1.CREB5.CSRNP3.DLX1.DLX6.DUXA.E2F3.EGR2.ELK1.EP300.EZH1.FOXD3.FOXP2.FOXP4.FOXP1.GATAD1.GATAD2B.GCM2.GRHL2.GTF2IRD2.GTF2IRD2B.HCF1.HEY2.HOXA2.HOXA9.IKZF2.KDM5B.KLF12.KMT2A.KMT2D.MECP2.MIXL1.MLXIP.MTA3.MYB.MYOC.D.MZF1.NCOR1.NEUROD6.NFAT5.NKX24.NR1D2.NR2F2.OLIG2.ONCUT2.PA2G4.PATZ1.PAX5.PLAG1.POU2F1.POU3F2.PURA.RORB.RUNX3.SIN3A.SMAD4.SMARCC2.SP1.SP5.SPIB.STAT4.TAF5L.TBX15.TEAD1.TET3.TGIF2.THAP8.TP53.UNKL.VEZF1.XBP1.ZBTB20.ZBTB4.ZBTB7A.ZEB1.ZFP14.ZFP30.ZFP91.ZFX.ZHX2.ZHX3.ZKSCAN1.ZMYM4.ZNF131.ZNF160.ZNF182.ZNF189.ZNF229.ZNF25.ZNF317.ZNF331.ZNF335.ZNF33A.ZNF347.ZNF37A.ZNF426.ZNF430.ZNF440.ZNF445.ZNF454.ZNF460.ZNF483.ZNF490.ZNF500.ZNF514.ZNF555.ZNF557.ZNF568.ZNF592.ZNF625.ZNF696.ZNF700.ZNF711.ZNF791.ZNF793.ZNF805.ZNF84 | GO       |
| Generic Transcription Pathway             | 93/ 1112 | 0.0024 | AIFM2.BARD1.BDNF.C12orf5.CAMK2G.CAMK4.CBX2.CBX3.CCND2.CDK12.CDK13.CDK4.CDKN1B.CHD3.CREB1.CYCS.DLX6.EP300.GATAD2B.GPAM.GRIN2B.GTF2H5.HEY2.IRAK1.KDM5B.KMT2A.KMT2D.MAMLD1.MDM4.MMP13.MYB.NCOR1.NDUFA4.NR1D2.PAX5.PERP.POLR2E.PPARGC1A.PPP1R13B.PRKCB.PSMB6.RBL1.RORB.RQCD1.RRM2.RUNX3.SIN3A.SKP1.SMAD4.SMARCC2.SMARCD1.SP1.SUMO1.TEAD1.TGIF2.TNRC6A.TNRC6B.TNRC6C.TP53.TP53INP1.VEGFA.ZFP14.ZFP30.ZKSCAN1.ZNF160.ZNF189.ZNF25.ZNF317.ZNF331.ZNF33A.ZNF347.ZNF37A.ZNF426.ZNF430.ZNF440.ZNF445.ZNF454.ZNF460.ZNF483.ZNF486.ZNF490.ZNF500.ZNF514.ZNF555.ZNF557.ZNF568.ZNF625.ZNF696.ZNF700.ZNF711.ZNF773.ZNF791.ZNF793                                                                                                                                                                                      | Reactome |
| RNA Polymerase II Transcription           | 100/1233 | 0.0024 | AIFM2.BARD1.BDNF.C12orf5.CAMK2G.CAMK4.CBX2.CBX3.CCND2.CDK12.CDK13.CDK4.CDKN1B.CHD3.CPSF7.CREB1.CYCS.DLX6.EP300.GATAD2B.GPAM.GRIN2B.GTF2H5.HEY2.IRAK1.KDM5B.KMT2A.KMT2D.MAMLD1.MDM4.MMP13.MYB.NCOR1.NDUFA4.NR1D2.PAX5.PERP.POLDIP3.POLR2E.POU2F1.PPARGC1A.PPP1R13B.PRKCB.PSMB6.RBL1.RORB.RPRD2.RQCD1.RRM2.RUNX3.SIN3A.SKP1.SMAD4.SMARCC2.SMARCD1.SNRPD3.SP1.SRSF2.SRSF3.SUMO1.TEAD1.TGIF2.TNRC6A.TNRC6B.TNRC6C.TP53.TP53INP1.VEGFA.ZFP14.ZFP30.ZKSCAN1.ZNF160.ZNF189.ZNF25.ZNF317.ZNF331.ZNF33A.ZNF347.ZNF37A.ZNF426.ZNF430.ZNF440.ZNF445.ZNF454.ZNF460.ZNF483.ZNF486.ZNF490.ZNF500.ZNF514.ZNF555.ZNF557.ZNF568.ZNF625.ZNF696.ZNF700.ZNF711.ZNF773.ZNF791.ZNF793                                                                                                                                        | Reactome |
| Gene expression (Transcription)           | 106/1366 | 0.0034 | AIFM2.BARD1.BDNF.C12orf5.CAMK2G.CAMK4.CBX2.CBX3.CCND2.CDK12.CDK13.CDK4.CDKN1B.CHD3.CPSF7.CREB1.CYCS.DLX6.EP300.GATAD2B.GPAM.GRIN2B.GTF2H5.HEY2.IRAK1.KDM5B.KMT2A.KMT2D.MAMLD1.MDM4.MMP13.MTA3.MYB.NCOR1.NDC1.NDUFA4.NR1D2.PAX5.PERP.POLDIP3.POLR2E.POM121.POM121C.POU2F1.PPARGC1A.PPP1R13B.PRKCB.PSMB6.RBL1.RORB.RPRD2.RQCD1.RRM2.RUNX3.SAP30L.SIN3A.SKP1.SMAD4.SMARCC2.SMARCD1.SNRPD3.SP1.SRSF2.SRSF3.SUMO1.TEAD1.TET3.TGIF2.TNRC6A.TNRC6B.TNRC6C.TP53.TP53INP1.VEGFA.ZFP14.ZFP30.ZKSCAN1.ZNF160.ZNF189.ZNF25.ZNF317.ZNF331.ZNF33A.ZNF347.ZNF37A.ZNF426.ZNF430.ZNF440.ZNF445.ZNF454.ZNF460.ZNF483.ZNF486.ZNF490.ZNF500.ZNF514.ZNF555.ZNF557.ZNF568.ZNF625.ZNF696.ZNF700.ZNF711.ZNF773.ZNF791.ZNF793                                                                                                   | Reactome |

FDR. false discovery rate; GO. gene ontology; KW. keyword.
